# Supplementary material for: Subtle tuning of nanodefects actuates highly efficient electrocatalytic oxidation
Source: PubMed Central journal article supplement (PMC10097648; doi:10.1038/s41467-023-37676-6), 2023-04-12
Supplement: 41467_2023_37676_MOESM1_ESM.pdf [file 41467_2023_37676_MOESM1_ESM.pdf]

1  
2 **Supplemental Information**

3  
4 **Subtle tuning of nanodefects actuates highly efficient**  
5 **electrocatalytic oxidation**  
6

7 Yifan Gao<sup>a, 1</sup>, Shuai Liang<sup>b, 1\*</sup>, Biming Liu<sup>a</sup>, Chengxu Jiang<sup>a</sup>, Chenyang Xu<sup>a</sup>, Xiaoyuan  
8 Zhang<sup>a</sup>, Peng Liang<sup>a</sup>, Menachem Elimelech<sup>c\*</sup>, Xia Huang<sup>a\*</sup>  
9

10 <sup>a</sup>State Key Joint Laboratory of Environment Simulation and Pollution Control, School of  
11 Environment, Tsinghua University, Beijing 100084, China

12 <sup>b</sup>Beijing Key Lab for Source Control Technology of Water Pollution, College of  
13 Environmental Science and Engineering, Beijing Forestry University, Beijing 100083, China

14 <sup>c</sup>Department of Chemical and Environmental Engineering, Yale University, New Haven, CT  
15 06520-8286, USA  
16

17 \*Corresponding author: E-mail: xhuang@tsinghua.edu.cn;

18 \*Corresponding author: E-mail: shuai\_liang@bjfu.edu.cn

19 \*Corresponding author: E-mail: meachem.elimelech@yale.edu

20 <sup>1</sup>Y.G. and S.L. contributed equally to this work  
21

22 This PDF file includes:

23 Supplementary Note 1 to 3

24 Supplementary Figures 1 to 29

25 Supplementary Tables 1 to 5

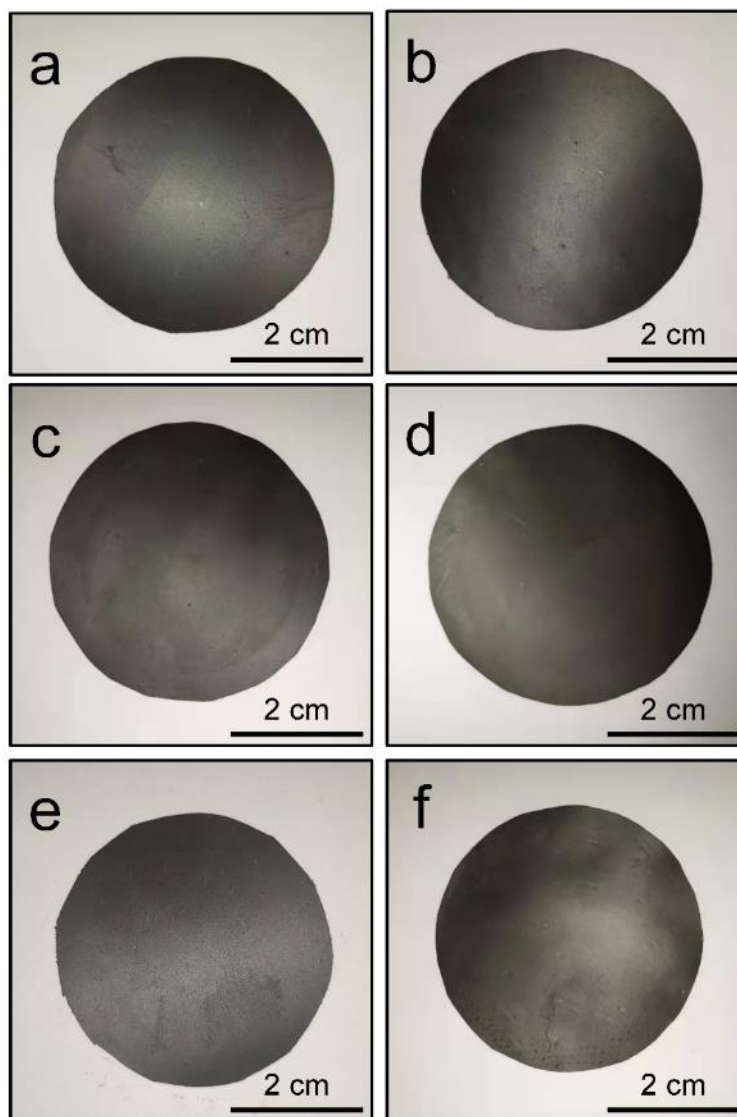

26

27 **Supplementary Figure 1.** Photographs of the different CN membranes (i.e., (a) CN\_500, (b)  
28 CN\_700, (c) CN\_800, (d) CN\_1100, (e) CN\_1300, and (f) CN\_1500).

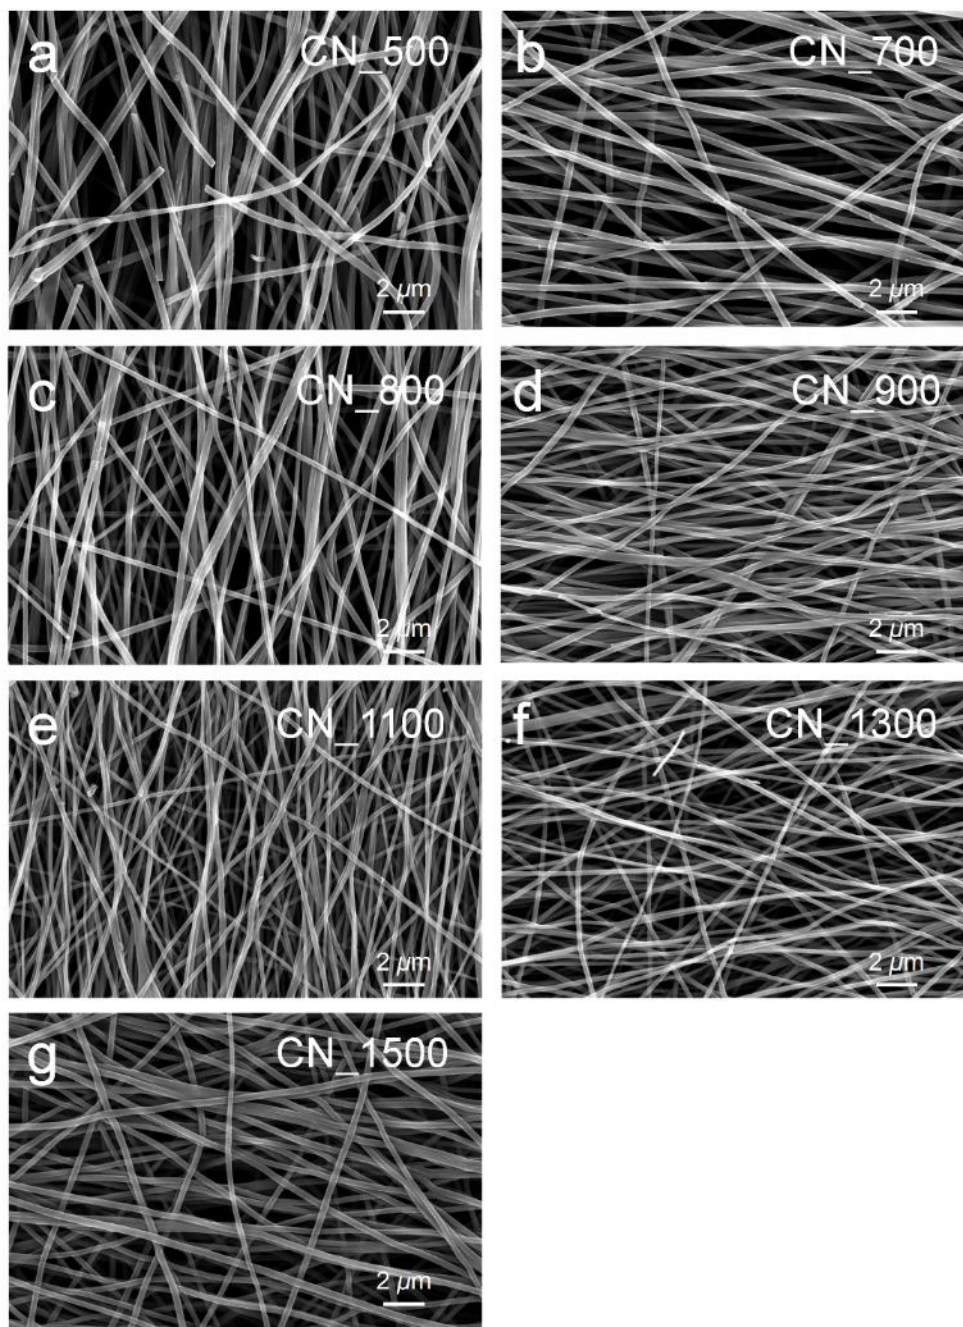

29

30 **Supplementary Figure 2.** SEM images of the (a) CN\_500, (b) CN\_700, (c) CN\_800, (d)  
31 CN\_900, (e) CN\_1100, (f) CN\_1300, and (g) CN\_1500 membranes.

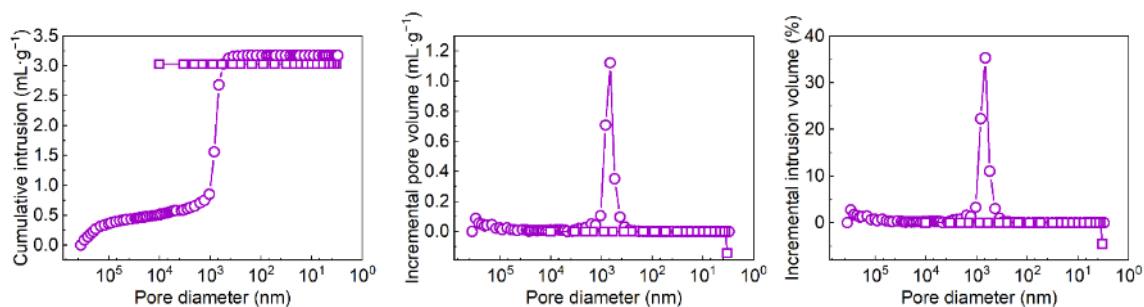

32

33 **Supplementary Figure 3.** Results of the mercury intrusion porosimetry method for the  
 34 prepared CN<sub>900</sub> membrane.

35

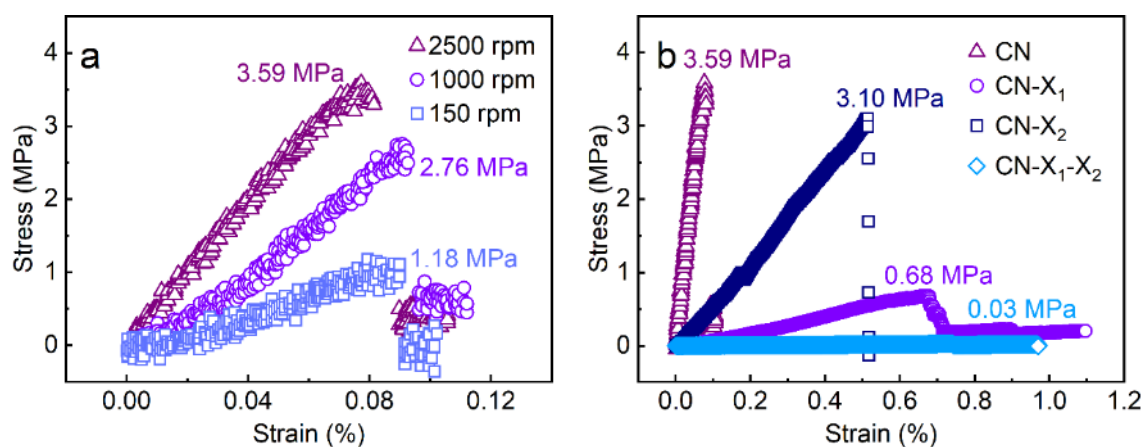

36

37 **Supplementary Figure 4.** Measured tensile stress–strain curves of different CN membranes  
 38 prepared with (a) different cylinder rotation speed and (b) different external pressure conditions;  
 39 the suffixes X<sub>1</sub> and X<sub>2</sub> indicate the absence of the pre-oxidation pressure and the absence of  
 40 the carbonization pressure, respectively. Note: all the CN membranes in this figure was  
 41 carbonized at 900 °C.

42

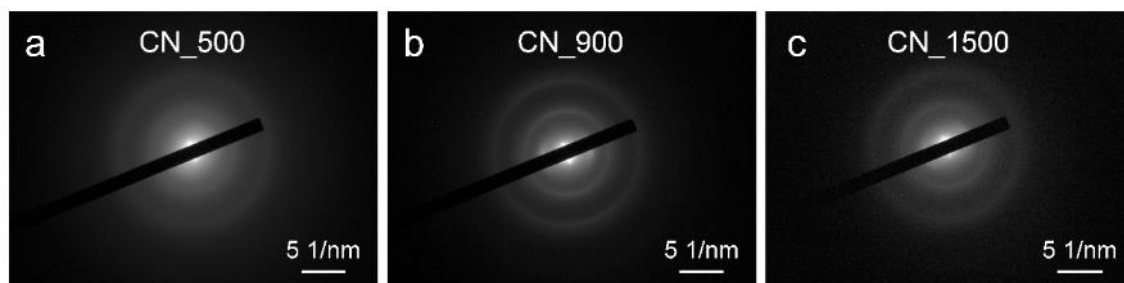

43

44 **Supplementary Figure 5.** Selected area electron diffraction (SAED) patterns of the (a)  
 45 CN<sub>500</sub>, (b) CN<sub>900</sub>, and (c) CN<sub>1500</sub>.

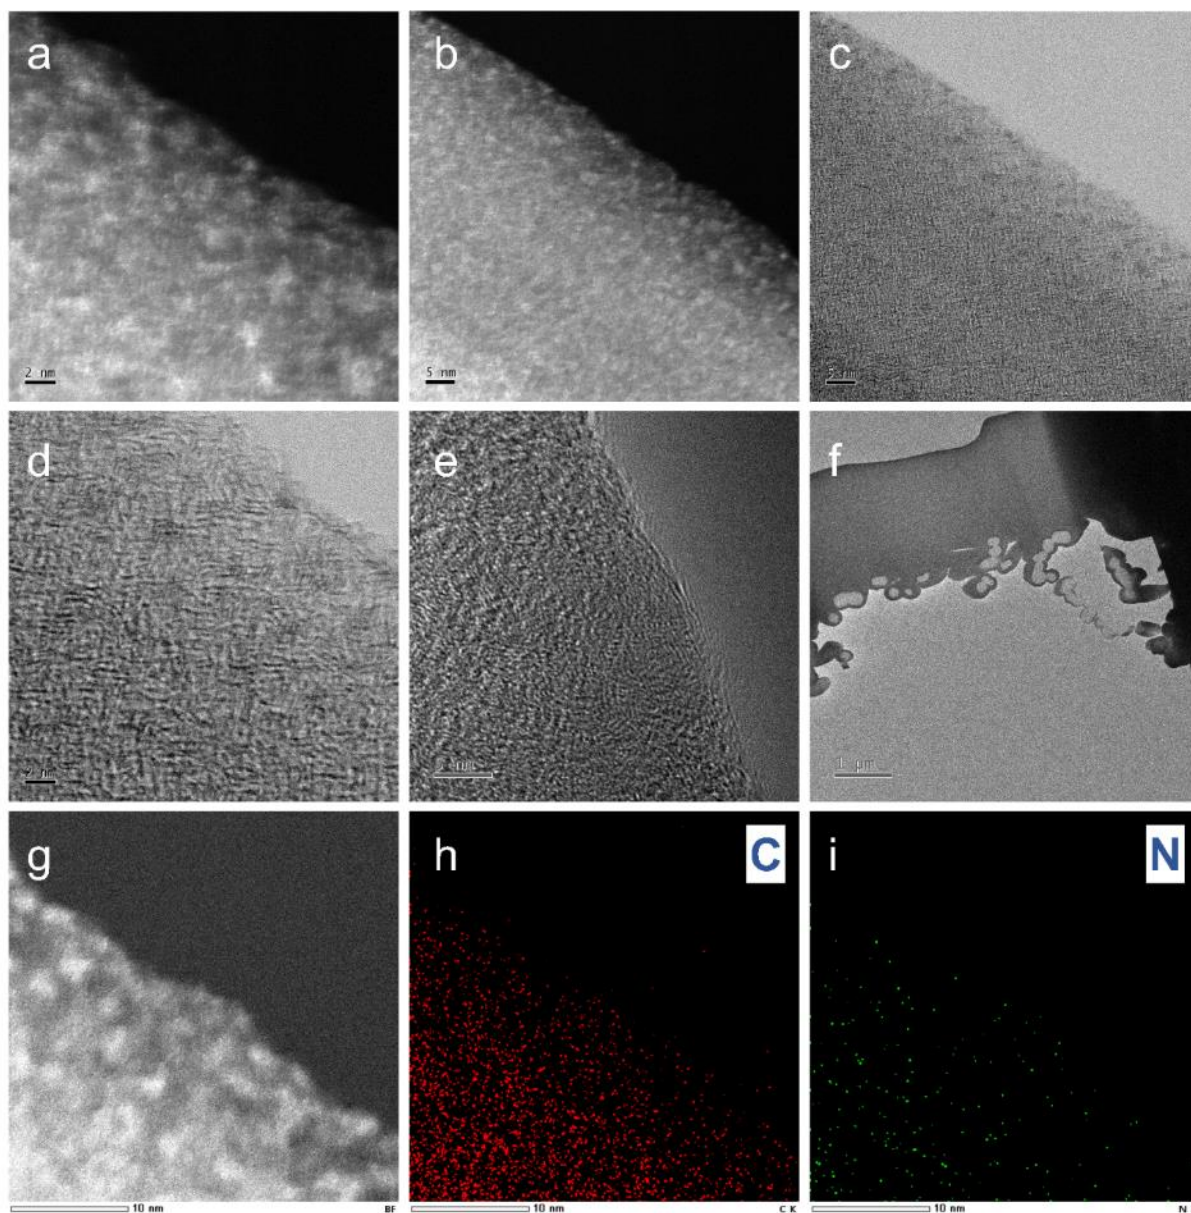

46

47 **Supplementary Figure 6.** (a and b) High-angle annular dark-field scanning transmission  
 48 electron microscopy (HAADF-STEM) images of CN\_900. (c and d) Annular bright field  
 49 scanning transmission electron microscopy (ABF-STEM) images of CN\_900. (e) HRTEM  
 50 image of CN\_900. (f) TEM image showing the CN\_900 prepared by focused ion beam-  
 51 scanning electron microscope (FIB-SEM) technique. (g-i) Elemental mapping images by EDS  
 52 of CN\_900.

53 **Supplementary Note 1.**

54 The “river like” disturbed lattice structures could hardly be observed in CN\_500 (**Figure 2j**),  
55 indicating that the graphitization of CN\_500 was negligible. As for CN\_1500, there were more  
56 obvious and longer lattice stripes (**Figure 2l**) with rare amorphous structures. This suggested  
57 that the graphitization degree of CN\_1500 was the highest, leaving few defective structures.

58

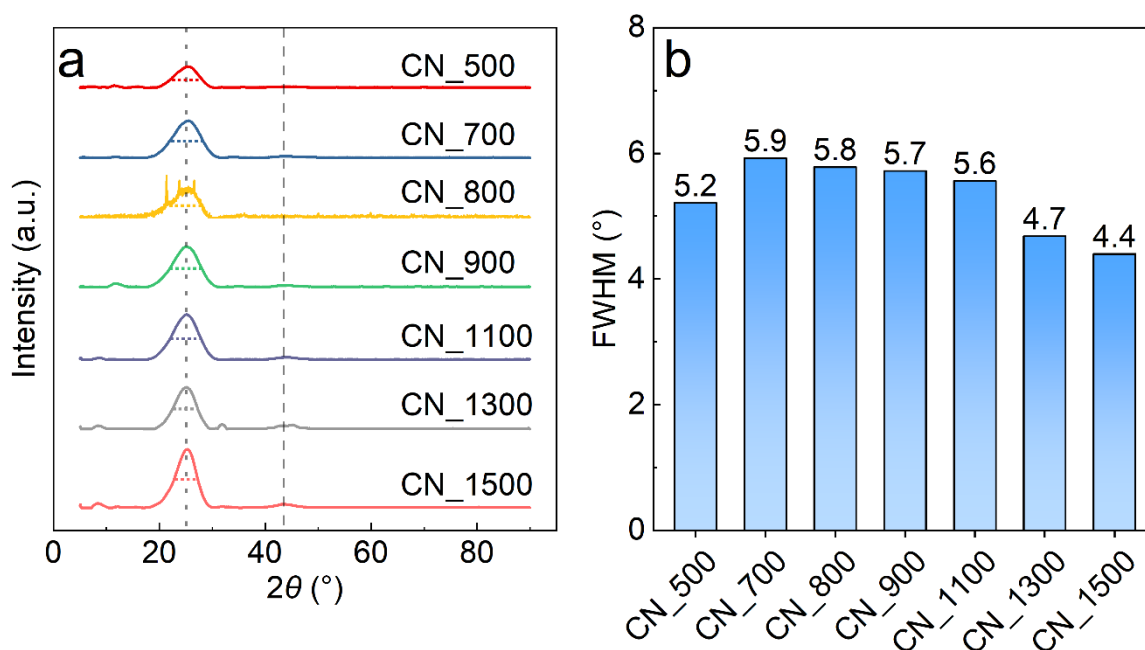

59

60 **Supplementary Figure 7. (a)** XRD patterns and **(b)** determined full width at half maximum  
61 (FWHM) data of the CN\_500, CN\_700, CN\_800, CN\_900, CN\_1100, CN\_1300, and  
62 CN\_1500.

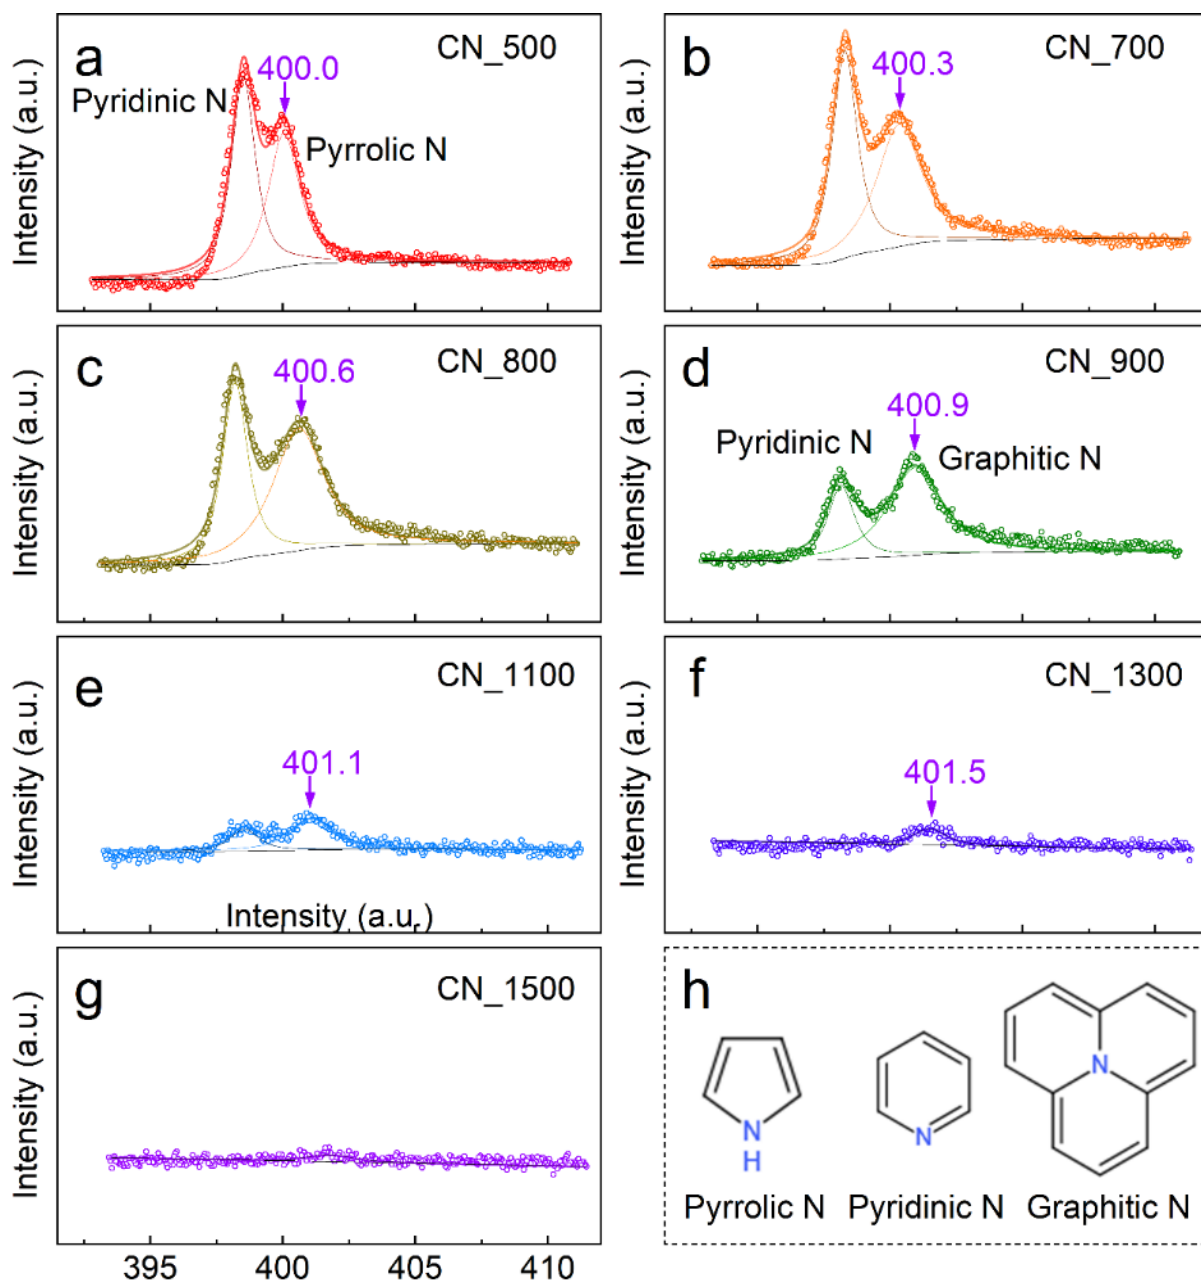

63

64 **Supplementary Figure 8.** High-resolution  $N\ 1s$  XPS spectra and fitted curves of the (a)  
 65 CN\_500, (b) CN\_700, (c) CN\_800, (d) CN\_900, (e) CN\_1100, (f) CN\_1300, and (g) CN\_1500;  
 66 and (h) chemical structures of pyrrolic N, pyridinic N, and graphitic N.

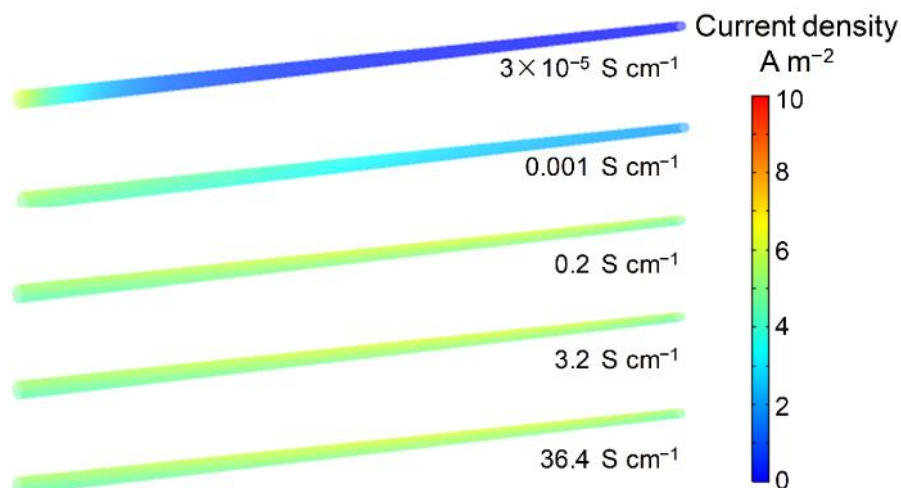

67

68 **Supplementary Figure 9.** Computed distributions of current density ( $\text{A m}^{-2}$ ) on the CN  
 69 models in different simulation scenarios (**Figure 5**, i.e., at different CN conductivities:  $3 \times 10^{-5}$ ,  
 70 0.001, 0.2, 3.2, and  $36.4 \text{ S cm}^{-1}$ ).

71

## 72 **Supplementary Note 2**

73 The analysis based on Fukui function was used to verify the region of active sites<sup>1</sup> of CNs as  
 74 well as to predict electrophilic, nucleophilic, and free radical attacks in pollutant regions<sup>2</sup>. The  
 75 program Multiwfn<sup>3,4</sup> was used to calculate the Fukui function with Hirshfeld charges. As  
 76 shown in **Supplementary Fig. 10**, the results of the Fukui function analysis of different CNs  
 77 are similar to the previous DFT calculations results. The  $f^-$  distribution of CN\_900 was much  
 78 more inhomogeneous. The regions around the defects have larger values of  $f^-$  (**Supplementary**  
 79 **Table 1**), which means that these regions are more reactive. The electrophilicity indices of  
 80 CN\_500, CN\_900, and CN\_1500 unit-regions were calculated to be 1.72, 2.84, and 2.49 eV,  
 81 respectively. Overall, CN\_900 was expected to achieve the highest electrocatalytic reactivity  
 82 based on the Fukui function analysis. In addition, the Fukui function analysis (**Supplementary**  
 83 **Fig. 11** and **Supplementary Table 2**) shows that the amino group (N4) in the PRO structure  
 84 are more susceptible to electrophilic attack (higher  $f^-$ ) and the benzene ring (C10–13, C15–18)  
 85 is highly susceptible to free radical attack (higher  $f^0$ ).



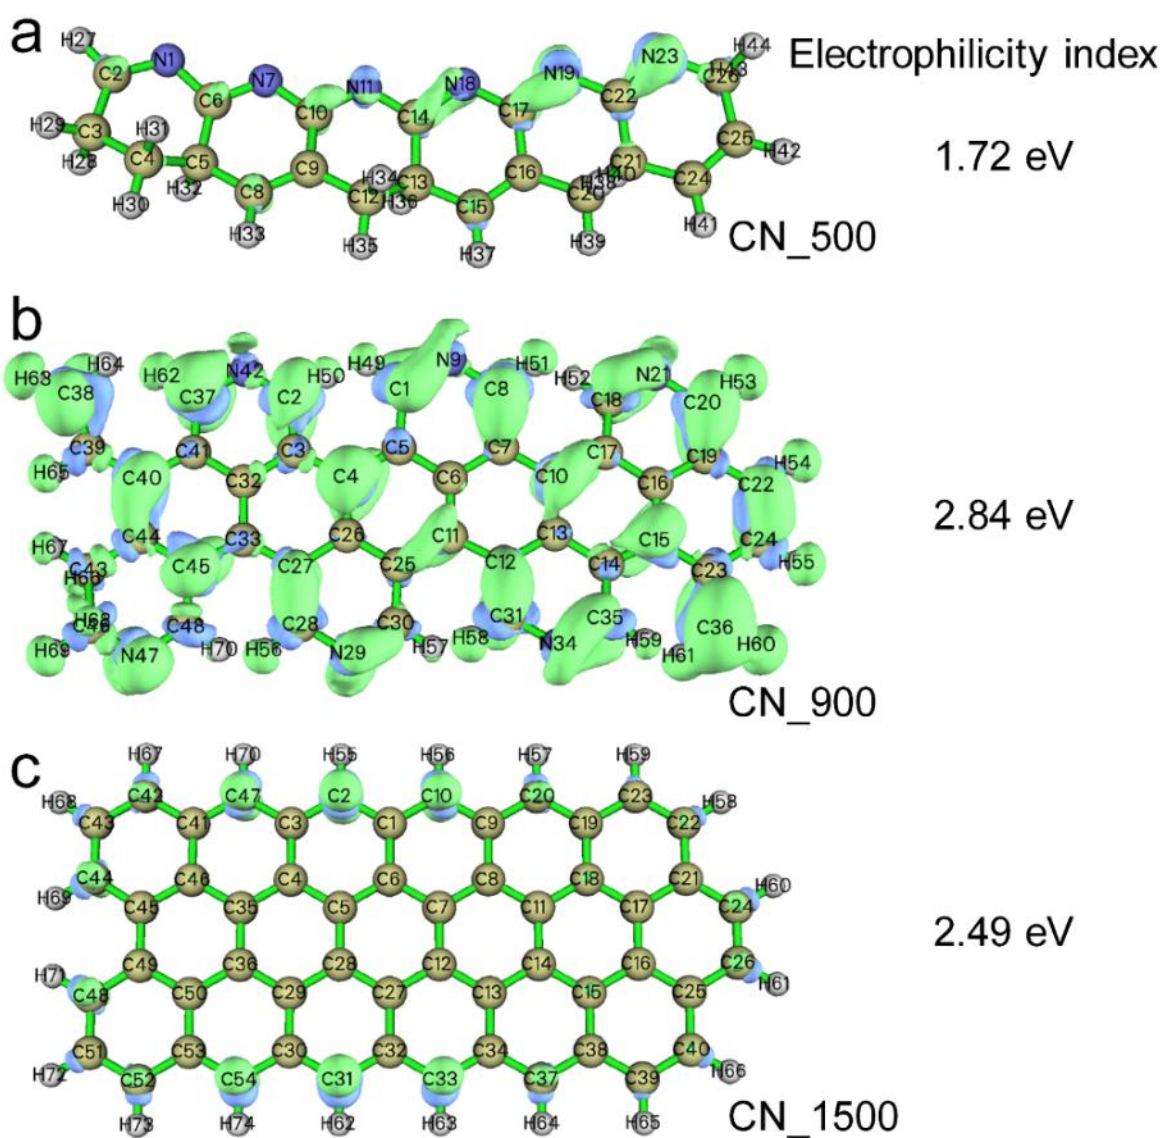

86

87 **Supplementary Figure 10.** Representation of the Fukui function  $f^+$  of the (a) CN\_50, (b) CN\_90,  
88 and (c) CN\_1500. The calculated electrophilicity indices were included.

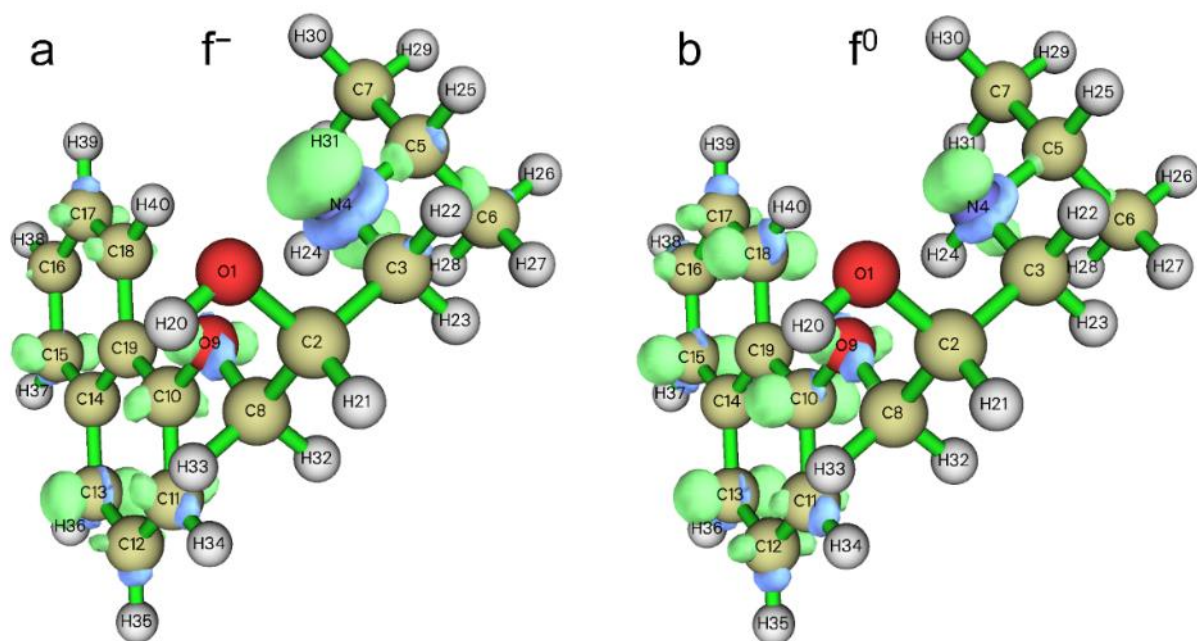

89

90 **Supplementary Figure 11.** Representation of the (a) Fukui function  $f^-$  and (b) Fukui function  $f^0$  of the  
 91 PRO.

92

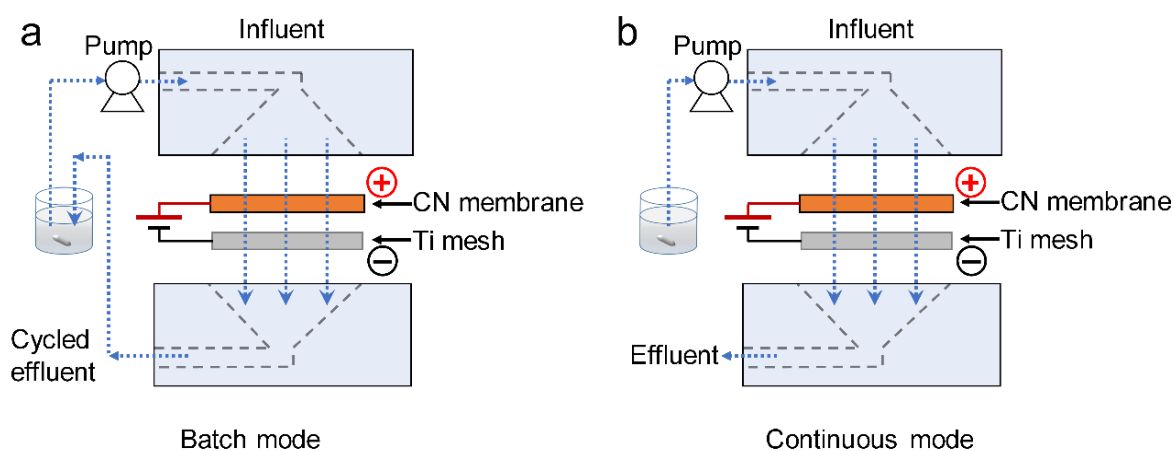

93

94 **Supplementary Figure 12.** Configurations of the electrocatalytic membrane filtration (EMF)  
 95 system operated at the (a) batch mode (i.e., effluent cycles back to feed reservoir, from where  
 96 the samples are taken for analyses) and (b) continuous mode (i.e., feed solution flows one time  
 97 through the reactor without circulation and the effluent is collected for analyses).

98

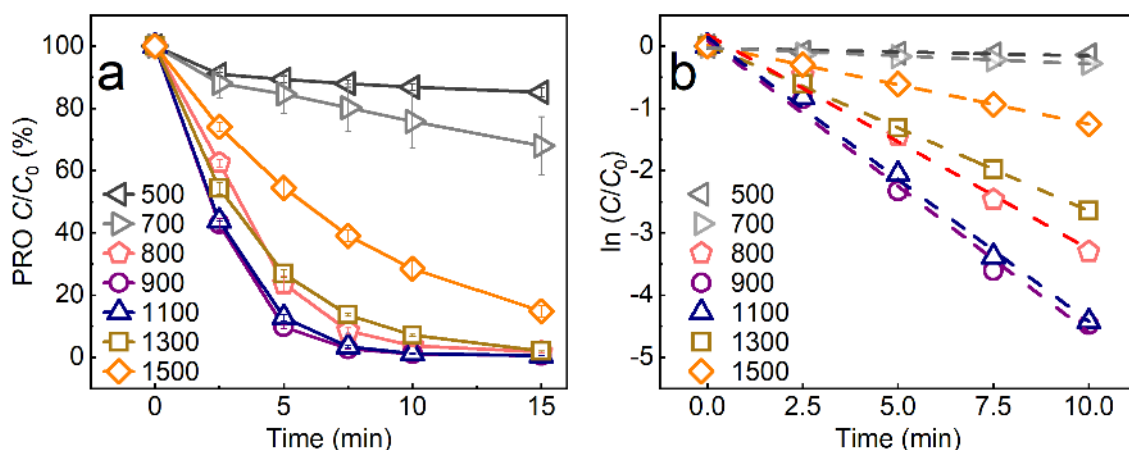

99

100 **Supplementary Figure 13.** Comparison of the electrocatalytic performance in a batch-mode  
 101 EMF system among the different CN membranes (i.e., CN\_500, CN\_700, CN\_800, CN\_900,  
 102 CN\_1100, CN\_1300, and CN\_1500) in terms of the (a)  $C/C_0$  and (b)  $\ln(C/C_0)$  decline trends.  
 103 The error bars represent the standard deviation and were calculated on the basis of at least three  
 104 experimental data points.

105

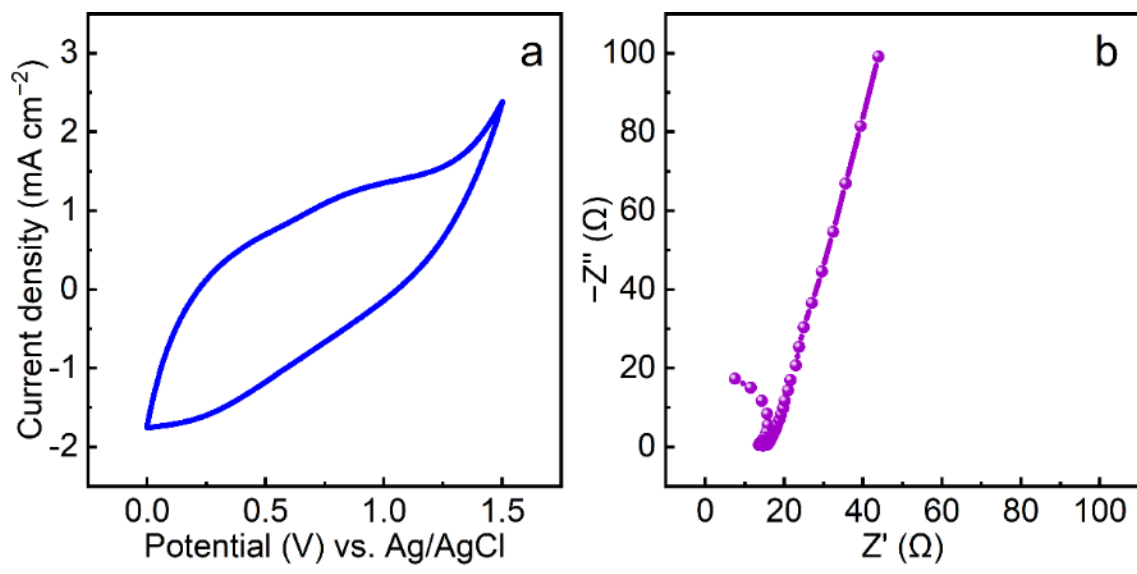

106

107 **Supplementary Figure 14.** (a) Cyclic voltammogram and (b) electrochemical impedance  
 108 spectroscopy of the CN\_900 membrane.

109

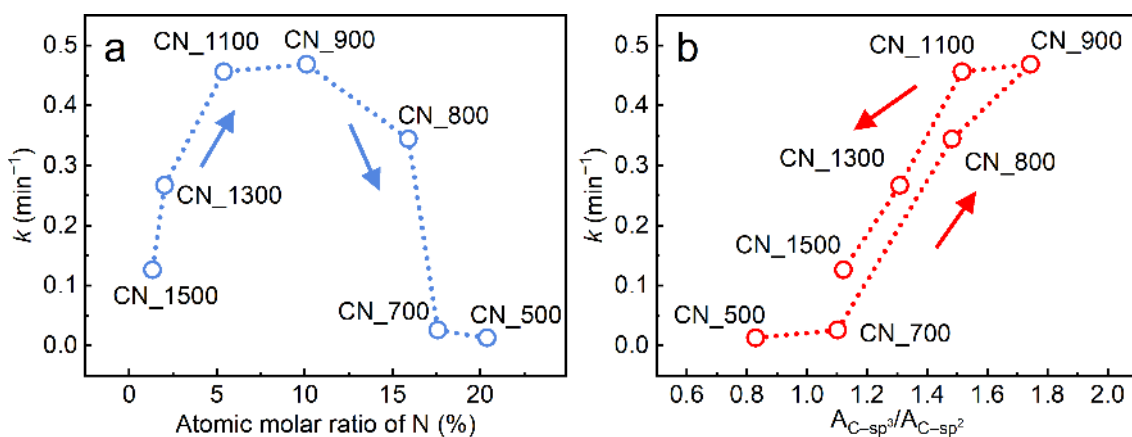

110

111 **Supplementary Figure 15.** (a) Correlation analysis between the calculated kinetic constants  
 112 ( $k$ ,  $\text{min}^{-1}$ ) of PRO degradation in a batch mode and atomic molar ratios of N for the different  
 113 CN membranes (i.e., CN\_500, CN\_700, CN\_800, CN\_900, CN\_1100, CN\_1300, and  
 114 CN\_1500). (b) Correlation analysis between  $k$  ( $\text{min}^{-1}$ ) and  $A_{C-sp^3}/A_{C-sp^2}$  ratio for the different  
 115 CN membranes.

116

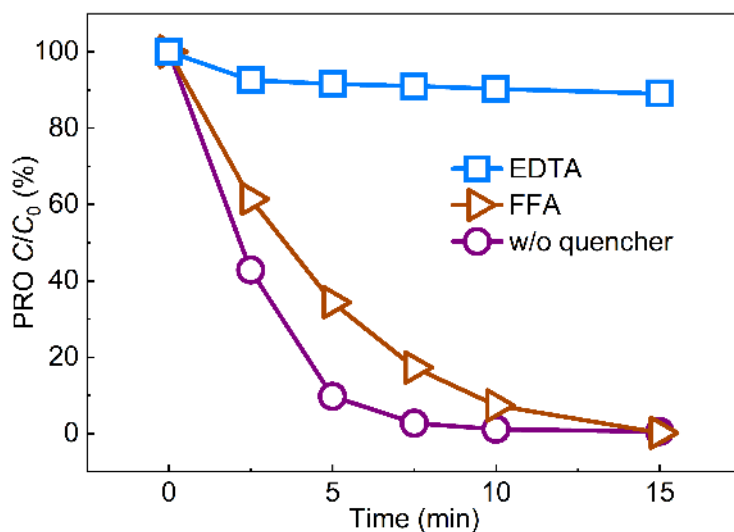

117

118 **Supplementary Figure 16.** Quenching tests revealing the contribution of direct oxidative hole  
 119 ( $h^+$ , quenched by 4 mM EDTA-2Na) and singlet oxygen ( $^1O_2$ , quenched by 16 mM FFA) to the  
 120 degradation of PRO ( $20 \text{ mg L}^{-1}$ ) by the CN\_900 membrane.

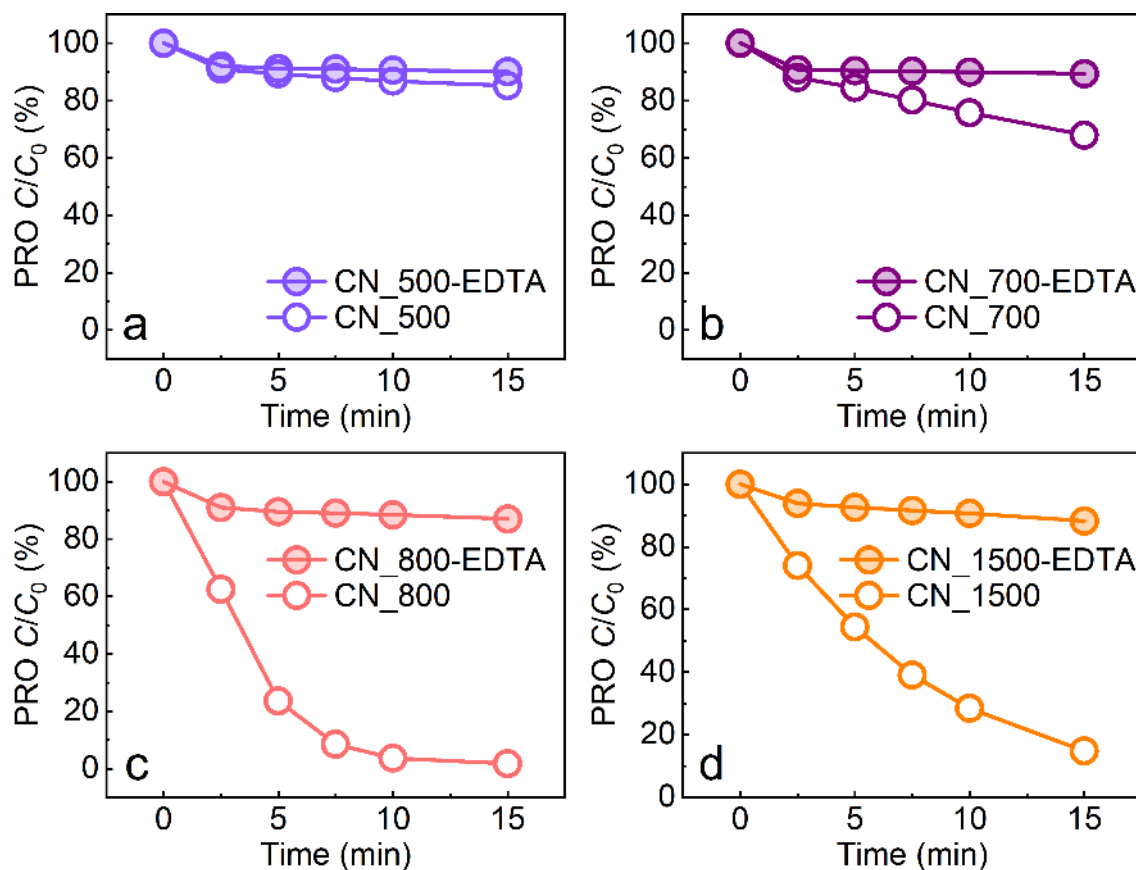

121

122 **Supplementary Figure 17.** Quenching tests revealing the contribution of direct oxidative hole  
 123 ( $h^+$ , quenched by 4 mM EDTA-2Na) to the degradation of PRO ( $20 \text{ mg L}^{-1}$ ) for different CN  
 124 membranes: (a) CN\_500, (b) CN\_700, (c) CN\_800, and (d) CN\_1500.

125

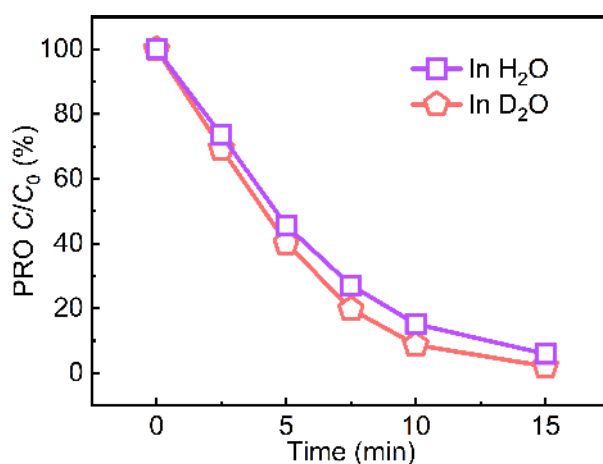

126

127 **Supplementary Figure 18.** Comparison of PRO ( $50 \text{ mg L}^{-1}$ ) degradation by CN<sub>900</sub>  
 128 electrocatalytic membrane in H<sub>2</sub>O and D<sub>2</sub>O solvents.

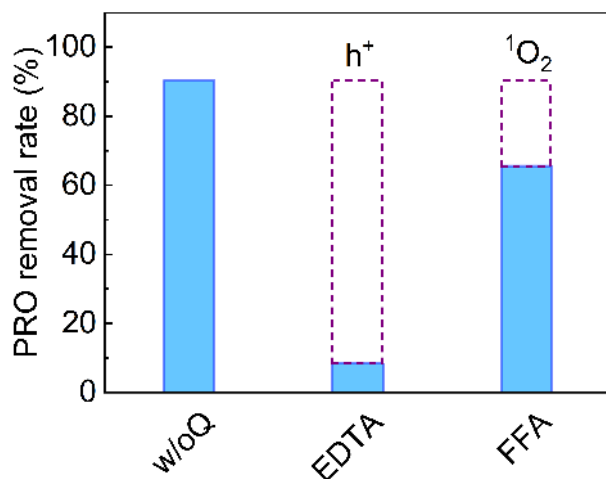

129

130 **Supplementary Figure 19.** Comparison of the PRO removal rates among different EMF tests  
 131 without the quencher (denoted as w/oQ) or with different quencher (EDTA-2Na and FFA). The  
 132 reduced portions marked with the dotted boxes indicate the amounts degraded by the quenched  
 133 oxidants, thus revealing the contribution ratios of different oxidants to pollutant degradation.

134

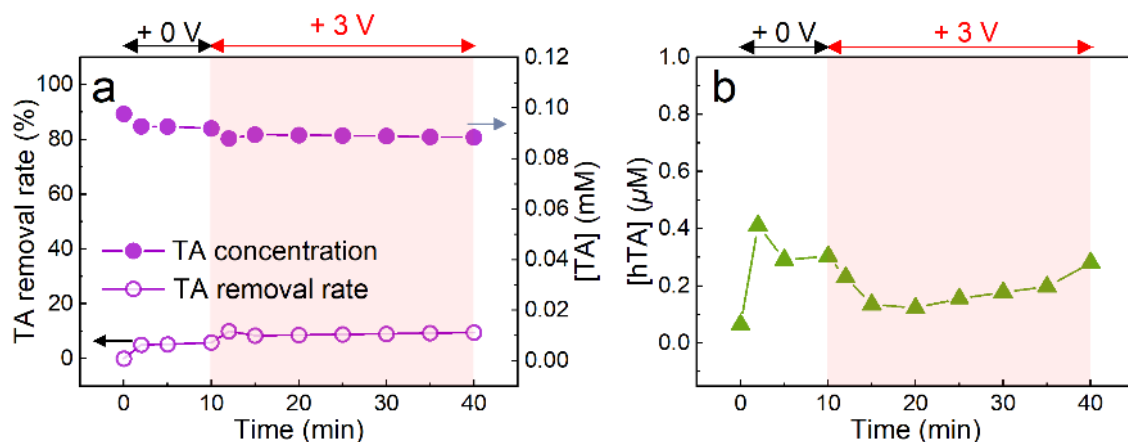

135

136 **Supplementary Figure 20.** Further revealing the mechanism of electrocatalytic degradation  
 137 performance of the CN\_900 membrane. (a) Probe test exploring the presence of  $\cdot\text{OH}$  through  
 138 the degradation of 100  $\mu\text{M}$  TA by the CN\_900 membrane. (b) Variation of the measured  
 139 concentration of hTA during the probe-test with TA for the CN\_900 membrane.

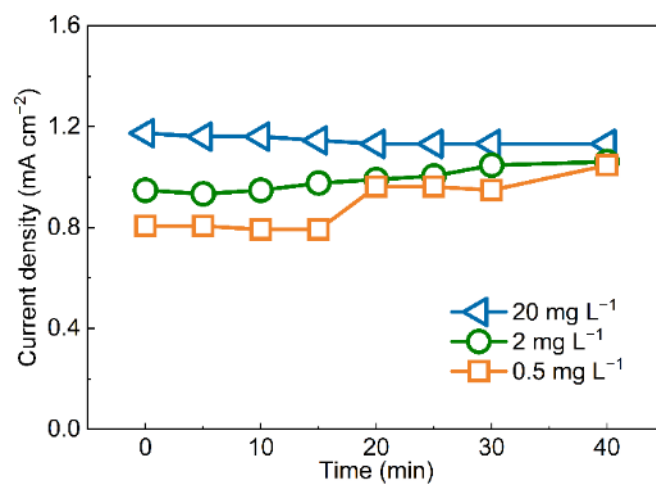

140

141 **Supplementary Figure 21.** Measured current densities ( $\text{mA cm}^{-2}$ ) during the continuous EMF  
 142 tests with the CN\_900 membrane at different PRO concentrations (initial concentration: 20, 2,  
 143 and  $0.5 \text{ mg L}^{-1}$ ).

144

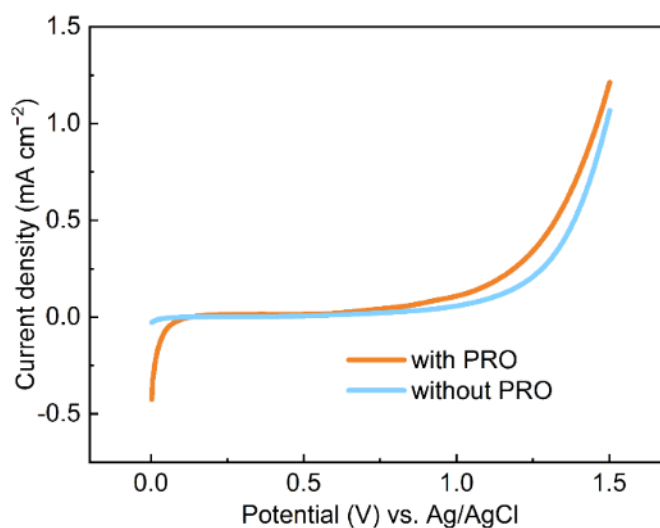

145

146 **Supplementary Figure 22.** Comparison of the LSV spectra between the measurements with  
 147 and without the presence of PRO ( $20 \text{ mg L}^{-1}$ ) based on the CN\_900 membrane.

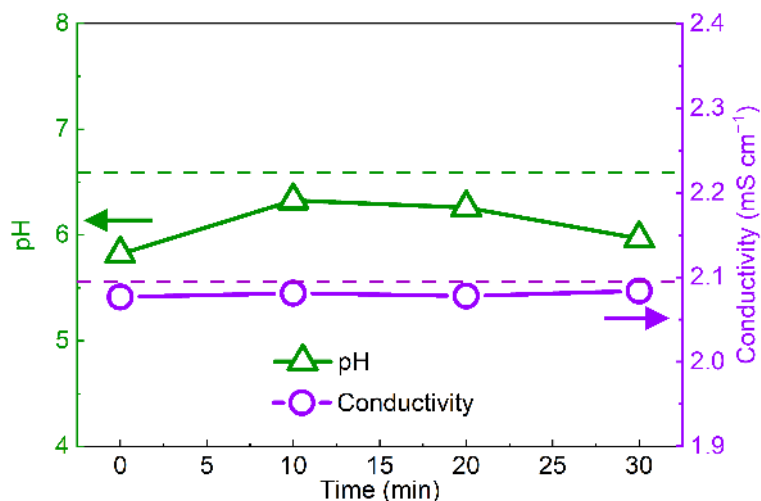

148

149 **Supplementary Figure 23.** Variations of the effluent pH and conductivity during the  
 150 continuous EMF tests based on the CN\_900 membrane and 20 mg L<sup>-1</sup> PRO influent. The green  
 151 and blue dotted lines indicate the influent pH and conductivity, respectively.

152

153 **Supplementary Note 3.**

154 Based on **Figure 6d** and **Figure 6g**, the kinetic degradation rate constants can be calculated for  
 155 five different pollutants: 329.9 min<sup>-1</sup> for RTD, 149.2 min<sup>-1</sup> for CIP, 142.7 min<sup>-1</sup> for CMT, 128.3  
 156 min<sup>-1</sup> for SMX, and 114.1 min<sup>-1</sup> for PRO. It can be seen that the reaction rate of direct anodic  
 157 oxidation differs for different pollutants. RTD is more suitable for direct oxidation than the  
 158 other four pollutants. The five pollutants (i.e., PRO, RTD, CIP, CMT, and SMX) used for the  
 159 tests represent the most typical types of micropollutants of pharmaceuticals and personal care  
 160 products that persist in water bodies: antibiotics (SMX and CIP), antagonists (CMT and RTD),  
 161 and antihypertension (PRO). The reason we selected them is that they are difficult to degrade  
 162 or remove by conventional water treatment technologies (e.g., biological processes, membrane  
 163 bioreactors, etc.).



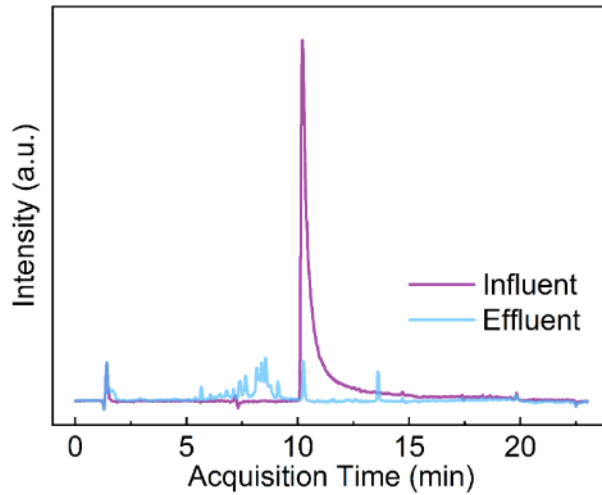

164

165 **Supplementary Figure 24.** Total ion current spectra measured by HPLC–MS/MS between the  
 166 influent and effluent during the EMF tests based on the CN\_900 membrane.

167

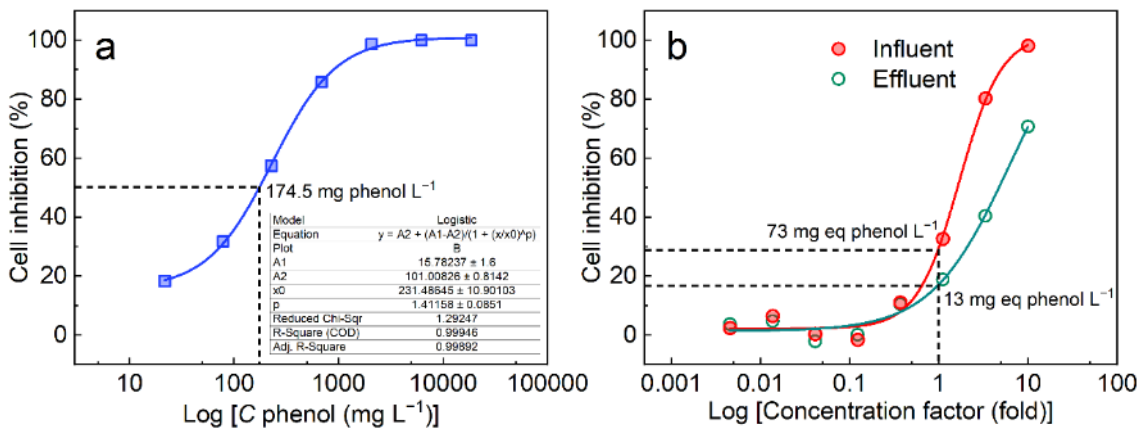

168

169 **Supplementary Figure 25. (a)** Standard curve of acute toxicity to *Vibrio fischeri* of phenol  
 170 solution. The fitting parameters and EC50 values are shown in the figure. **(b)** Acute toxicity to  
 171 *Vibrio fischeri* of the influent and effluent during the EMF tests based on the CN\_900  
 172 membrane.

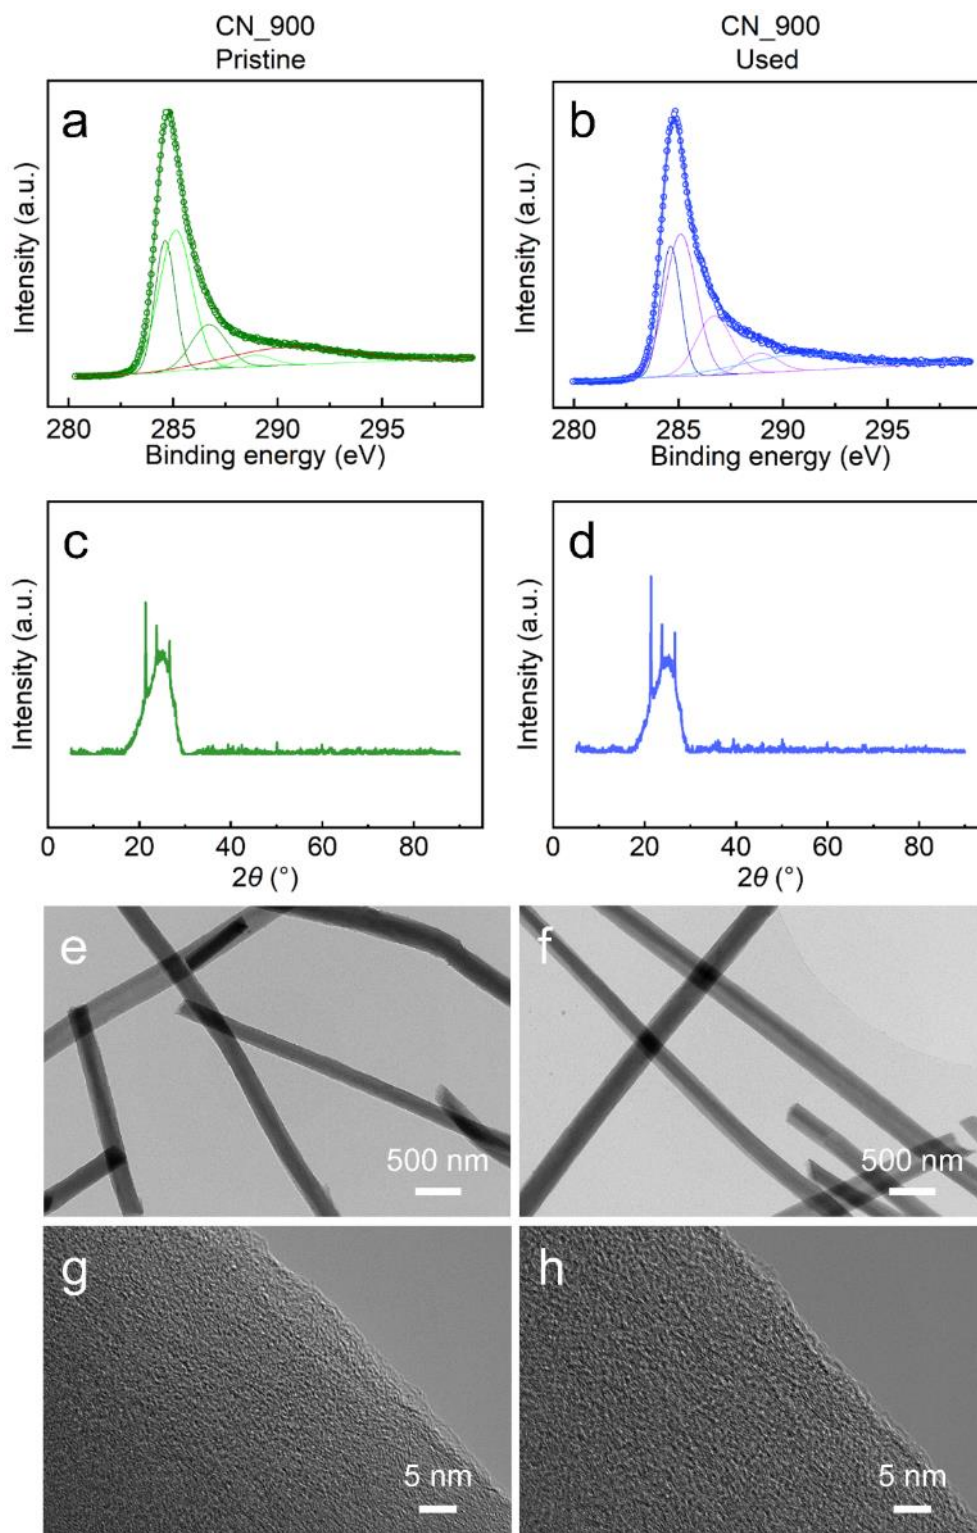

173

174 **Supplementary Figure 26. Comparisons in terms of chemical compositions and morphology of**  
 175 **the CN\_900 between its pristine and long-term-used states. C 1s XPS spectra of the (a) pristine and**  
 176 **(b) used CN\_900. XRD spectra of the (c) pristine and (d) used CN\_900. TEM images of the (e) pristine**  
 177 **and (f) used CN\_900. HRTEM images of the (g) pristine and (h) used CN\_900.**

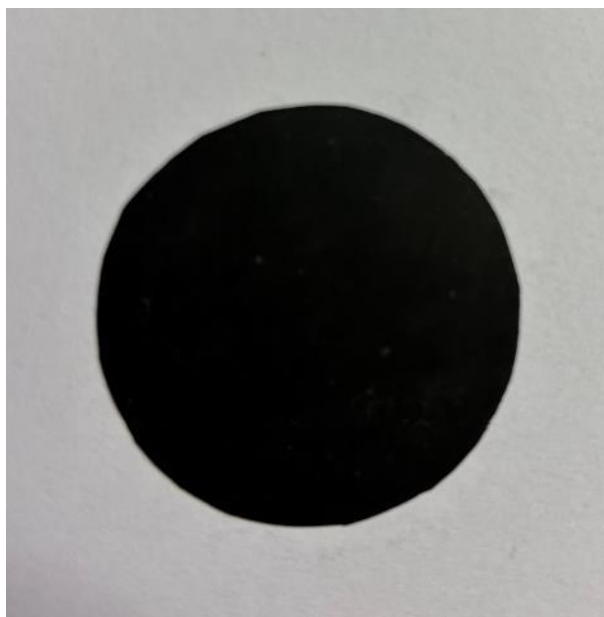

178

179 **Supplementary Figure 27.** Photograph of the CN\_900 membrane after EMF process.

180

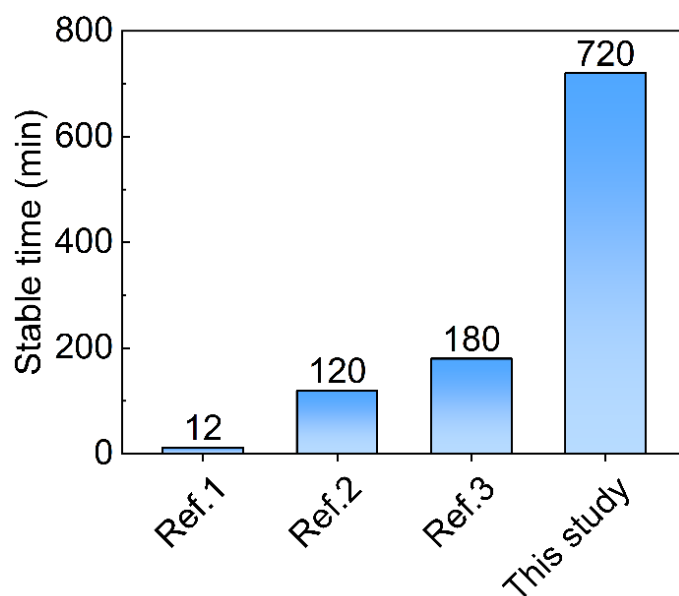

181

182 **Supplementary Figure 28.** Comparison of stable operation time between the CN\_900  
183 membrane in this study and other previously reported carbon-based electrocatalytic  
184 membranes (more details in **Supplementary Table 2**).

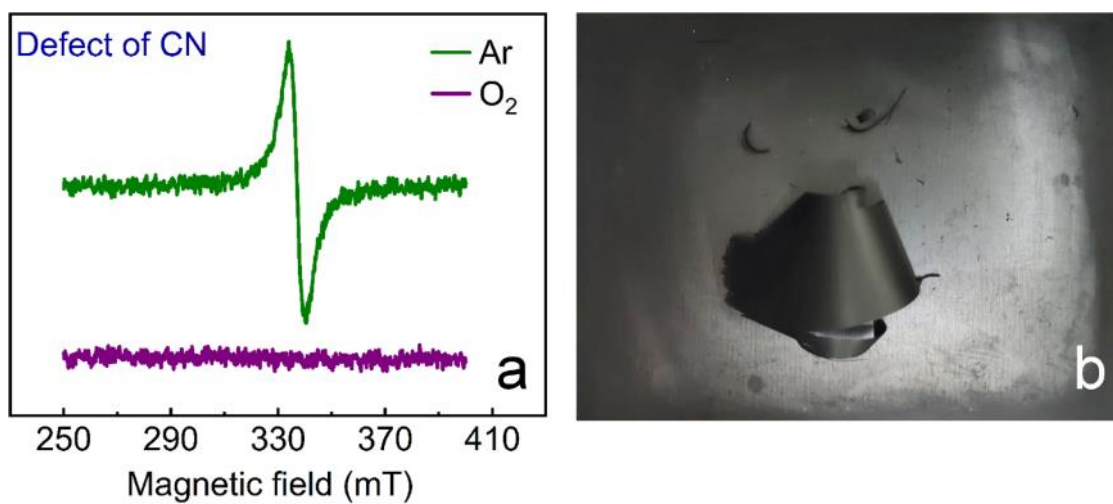

185

186 **Supplementary Figure 29.** (a) Comparison of ESR spectra of CN membranes carbonized at  
187 900 °C under Ar and air atmospheres (with O<sub>2</sub>). (b) Photographs of the CN membranes  
188 carbonized at 900 °C under air atmospheres (with O<sub>2</sub>).

189 **Supplementary Table 1.** Calculated Hirshfeld charges, condensed Fukui functions and  
 190 condensed dual descriptors (CDD) of CN\_900.

| Atom  | q(N)    | q(N+1)  | q(N-1)  | f <sup>-</sup> | f <sup>+</sup> | f <sup>0</sup> | CDD     |
|-------|---------|---------|---------|----------------|----------------|----------------|---------|
| 1(C)  | 0.029   | -0.0015 | 0.0521  | 0.023          | 0.0305         | 0.0268         | 0.0075  |
| 2(C)  | 0.019   | -0.0033 | 0.0466  | 0.0276         | 0.0224         | 0.025          | -0.0052 |
| 3(C)  | -0.0062 | -0.0093 | 0.0004  | 0.0066         | 0.0032         | 0.0049         | -0.0034 |
| 4(C)  | 0.0083  | -0.0211 | 0.0351  | 0.0268         | 0.0295         | 0.0281         | 0.0026  |
| 5(C)  | -0.0018 | -0.009  | 0.0026  | 0.0044         | 0.0072         | 0.0058         | 0.0027  |
| 6(C)  | 0.0047  | 0.0006  | 0.009   | 0.0043         | 0.0041         | 0.0042         | -0.0002 |
| 7(C)  | -0.0058 | -0.0143 | 0.0041  | 0.0099         | 0.0086         | 0.0092         | -0.0014 |
| 8(C)  | 0.021   | -0.0023 | 0.0512  | 0.0302         | 0.0233         | 0.0267         | -0.0069 |
| 9(N)  | -0.1572 | -0.1807 | -0.1363 | 0.0209         | 0.0235         | 0.0222         | 0.0026  |
| 10(C) | 0.0089  | -0.0076 | 0.026   | 0.0171         | 0.0165         | 0.0168         | -0.0006 |
| 11(C) | 0.0074  | -0.0058 | 0.0185  | 0.0111         | 0.0132         | 0.0121         | 0.0021  |
| 12(C) | -0.0054 | -0.0146 | 0.0062  | 0.0117         | 0.0092         | 0.0104         | -0.0025 |
| 13(C) | 0.0048  | 0.0005  | 0.0098  | 0.0051         | 0.0042         | 0.0046         | -0.0008 |
| 14(C) | -0.0027 | -0.011  | 0.0032  | 0.0059         | 0.0083         | 0.0071         | 0.0025  |
| 15(C) | 0.0133  | -0.0114 | 0.0312  | 0.0179         | 0.0246         | 0.0213         | 0.0067  |
| 16(C) | 0.0064  | 0.0002  | 0.0122  | 0.0059         | 0.0062         | 0.006          | 0.0003  |
| 17(C) | -0.0018 | -0.0128 | 0.0038  | 0.0056         | 0.0109         | 0.0083         | 0.0053  |
| 18(C) | 0.0243  | 0.0092  | 0.0401  | 0.0158         | 0.0152         | 0.0155         | -0.0006 |
| 19(C) | -0.0086 | -0.0214 | 0.0058  | 0.0145         | 0.0128         | 0.0136         | -0.0017 |
| 20(C) | 0.0155  | -0.0038 | 0.0466  | 0.0311         | 0.0193         | 0.0252         | -0.0117 |
| 21(N) | -0.1585 | -0.1869 | -0.1333 | 0.0252         | 0.0285         | 0.0268         | 0.0033  |
| 22(C) | -0.0398 | -0.0546 | -0.0199 | 0.0199         | 0.0148         | 0.0174         | -0.0051 |
| 23(C) | 0.0033  | -0.0068 | 0.0153  | 0.0121         | 0.0101         | 0.0111         | -0.002  |
| 24(C) | -0.0367 | -0.0499 | -0.019  | 0.0177         | 0.0132         | 0.0154         | -0.0045 |
| 25(C) | -0.0032 | -0.0149 | 0.0039  | 0.0072         | 0.0116         | 0.0094         | 0.0044  |

|       |         |         |         |        |        |        |         |
|-------|---------|---------|---------|--------|--------|--------|---------|
| 26(C) | 0.0046  | -0.0012 | 0.0111  | 0.0065 | 0.0058 | 0.0062 | -0.0007 |
| 27(C) | -0.0086 | -0.021  | 0.0063  | 0.0148 | 0.0124 | 0.0136 | -0.0024 |
| 28(C) | 0.021   | 0.0085  | 0.0399  | 0.0189 | 0.0124 | 0.0157 | -0.0065 |
| 29(N) | -0.1546 | -0.1825 | -0.1288 | 0.0258 | 0.0279 | 0.0269 | 0.0022  |
| 30(C) | 0.0315  | 0.0154  | 0.0412  | 0.0097 | 0.0161 | 0.0129 | 0.0064  |
| 31(C) | 0.0205  | 0.0017  | 0.0445  | 0.024  | 0.0188 | 0.0214 | -0.0053 |
| 32(C) | 0.0053  | 0.001   | 0.0087  | 0.0033 | 0.0043 | 0.0038 | 0.001   |
| 33(C) | 0.0056  | 0.003   | 0.0092  | 0.0036 | 0.0026 | 0.0031 | -0.001  |
| 34(N) | -0.1595 | -0.184  | -0.1367 | 0.0228 | 0.0245 | 0.0237 | 0.0018  |
| 35(C) | 0.0289  | -0.0005 | 0.0464  | 0.0176 | 0.0294 | 0.0235 | 0.0119  |
| 36(C) | -0.0642 | -0.1074 | -0.013  | 0.0512 | 0.0432 | 0.0472 | -0.008  |
| 37(C) | 0.027   | -0.0061 | 0.057   | 0.03   | 0.0331 | 0.0316 | 0.0031  |
| 38(C) | -0.068  | -0.0976 | -0.0367 | 0.0313 | 0.0296 | 0.0304 | -0.0017 |
| 39(C) | -0.0377 | -0.0441 | -0.0306 | 0.0071 | 0.0064 | 0.0068 | -0.0007 |
| 40(C) | 0.0034  | -0.0187 | 0.0265  | 0.0231 | 0.022  | 0.0226 | -0.0011 |
| 41(C) | -0.0041 | -0.0101 | 0.0006  | 0.0047 | 0.006  | 0.0054 | 0.0012  |
| 42(N) | -0.1601 | -0.1785 | -0.1417 | 0.0184 | 0.0184 | 0.0184 | -0.0001 |
| 43(C) | -0.05   | -0.0548 | -0.0453 | 0.0048 | 0.0047 | 0.0048 | 0       |
| 44(C) | 0.0106  | 0.002   | 0.021   | 0.0104 | 0.0085 | 0.0095 | -0.0019 |
| 45(C) | -0.0066 | -0.03   | 0.0146  | 0.0212 | 0.0233 | 0.0223 | 0.0021  |
| 46(C) | -0.0113 | -0.0185 | -0.0043 | 0.007  | 0.0072 | 0.0071 | 0.0002  |
| 47(N) | -0.1604 | -0.1924 | -0.1303 | 0.0301 | 0.032  | 0.031  | 0.002   |
| 48(C) | 0.0309  | 0.0248  | 0.0344  | 0.0034 | 0.0061 | 0.0048 | 0.0026  |
| 49(H) | 0.0443  | 0.0326  | 0.0543  | 0.01   | 0.0117 | 0.0109 | 0.0017  |
| 50(H) | 0.0422  | 0.0334  | 0.0516  | 0.0094 | 0.0089 | 0.0091 | -0.0005 |
| 51(H) | 0.0444  | 0.0332  | 0.0558  | 0.0115 | 0.0111 | 0.0113 | -0.0003 |
| 52(H) | 0.0425  | 0.0353  | 0.0502  | 0.0077 | 0.0072 | 0.0075 | -0.0004 |
| 53(H) | 0.0472  | 0.0328  | 0.0634  | 0.0162 | 0.0143 | 0.0153 | -0.0019 |

|       |        |        |        |        |        |        |         |
|-------|--------|--------|--------|--------|--------|--------|---------|
| 54(H) | 0.0511 | 0.0381 | 0.0648 | 0.0137 | 0.013  | 0.0133 | -0.0007 |
| 55(H) | 0.0491 | 0.0368 | 0.0621 | 0.013  | 0.0123 | 0.0126 | -0.0006 |
| 56(H) | 0.0436 | 0.0353 | 0.0528 | 0.0092 | 0.0083 | 0.0087 | -0.0008 |
| 57(H) | 0.0452 | 0.0372 | 0.052  | 0.0068 | 0.0079 | 0.0074 | 0.0011  |
| 58(H) | 0.0437 | 0.0343 | 0.0535 | 0.0098 | 0.0095 | 0.0096 | -0.0003 |
| 59(H) | 0.0422 | 0.0298 | 0.0518 | 0.0097 | 0.0123 | 0.011  | 0.0027  |
| 60(H) | 0.046  | 0.0263 | 0.0653 | 0.0193 | 0.0197 | 0.0195 | 0.0003  |
| 61(H) | 0.0435 | 0.0311 | 0.0566 | 0.0131 | 0.0124 | 0.0127 | -0.0008 |
| 62(H) | 0.0411 | 0.028  | 0.0533 | 0.0122 | 0.0131 | 0.0126 | 0.0009  |
| 63(H) | 0.048  | 0.0319 | 0.0639 | 0.0159 | 0.016  | 0.016  | 0.0001  |
| 64(H) | 0.0446 | 0.0371 | 0.0523 | 0.0076 | 0.0075 | 0.0076 | -0.0001 |
| 65(H) | 0.0414 | 0.0327 | 0.0503 | 0.0089 | 0.0087 | 0.0088 | -0.0002 |
| 66(H) | 0.0409 | 0.0329 | 0.0489 | 0.008  | 0.008  | 0.008  | 0       |
| 67(H) | 0.0397 | 0.0321 | 0.0472 | 0.0075 | 0.0076 | 0.0076 | 0.0002  |
| 68(H) | 0.0366 | 0.0289 | 0.0439 | 0.0073 | 0.0077 | 0.0075 | 0.0004  |
| 69(H) | 0.0372 | 0.0254 | 0.0486 | 0.0114 | 0.0118 | 0.0116 | 0.0003  |
| 70(H) | 0.0433 | 0.038  | 0.0481 | 0.0048 | 0.0053 | 0.0051 | 0.0005  |

---

192 **Supplementary Table 2.** Calculated Hirshfeld charges, condensed Fukui functions and CDD  
 193 of PRO.

| Atom  | q(N)    | q(N+1)  | q(N-1)  | f <sup>-</sup> | f <sup>+</sup> | f <sup>0</sup> | CDD     |
|-------|---------|---------|---------|----------------|----------------|----------------|---------|
| 1(O)  | -0.231  | -0.2387 | -0.2218 | 0.0093         | 0.0077         | 0.0085         | -0.0015 |
| 2(C)  | 0.0463  | 0.0412  | 0.0529  | 0.0066         | 0.0051         | 0.0059         | -0.0014 |
| 3(C)  | -0.0142 | -0.0172 | 0.0021  | 0.0163         | 0.0031         | 0.0097         | -0.0132 |
| 4(N)  | -0.1681 | -0.1648 | -0.0653 | 0.1028         | -0.0033        | 0.0497         | -0.1061 |
| 5(C)  | 0.0176  | 0.0156  | 0.0297  | 0.0121         | 0.002          | 0.0071         | -0.0101 |
| 6(C)  | -0.0987 | -0.1018 | -0.0783 | 0.0204         | 0.0031         | 0.0117         | -0.0173 |
| 7(C)  | -0.0896 | -0.0914 | -0.0815 | 0.0082         | 0.0018         | 0.005          | -0.0064 |
| 8(C)  | 0.029   | 0.0218  | 0.0342  | 0.0052         | 0.0072         | 0.0062         | 0.002   |
| 9(O)  | -0.0763 | -0.0986 | -0.0491 | 0.0273         | 0.0222         | 0.0248         | -0.005  |
| 10(C) | 0.0748  | 0.0076  | 0.1127  | 0.0379         | 0.0671         | 0.0525         | 0.0292  |
| 11(C) | -0.0786 | -0.1313 | -0.0336 | 0.045          | 0.0528         | 0.0489         | 0.0078  |
| 12(C) | -0.0471 | -0.1132 | -0.0015 | 0.0456         | 0.0661         | 0.0558         | 0.0205  |
| 13(C) | -0.0549 | -0.1269 | 0.0157  | 0.0705         | 0.0721         | 0.0713         | 0.0015  |
| 14(C) | -0.0024 | -0.0204 | 0.009   | 0.0114         | 0.018          | 0.0147         | 0.0066  |
| 15(C) | -0.0402 | -0.1284 | 0.0121  | 0.0523         | 0.0882         | 0.0702         | 0.0359  |
| 16(C) | -0.0428 | -0.1098 | -0.002  | 0.0409         | 0.067          | 0.0539         | 0.0261  |
| 17(C) | -0.044  | -0.1102 | 0.0013  | 0.0453         | 0.0662         | 0.0557         | 0.0209  |
| 18(C) | -0.0383 | -0.1278 | 0.0002  | 0.0385         | 0.0895         | 0.064          | 0.0511  |
| 19(C) | -0.0146 | -0.0327 | -0.0066 | 0.008          | 0.0181         | 0.013          | 0.0101  |
| 20(H) | 0.1595  | 0.1547  | 0.1714  | 0.0119         | 0.0048         | 0.0084         | -0.0071 |
| 21(H) | 0.0264  | 0.0119  | 0.0463  | 0.0199         | 0.0144         | 0.0172         | -0.0055 |
| 22(H) | 0.0359  | 0.0223  | 0.0596  | 0.0237         | 0.0136         | 0.0186         | -0.0101 |
| 23(H) | 0.0158  | 0.0115  | 0.0419  | 0.0261         | 0.0043         | 0.0152         | -0.0218 |
| 24(H) | 0.0754  | 0.0838  | 0.0912  | 0.0158         | -0.0084        | 0.0037         | -0.0242 |
| 25(H) | 0.0283  | 0.0166  | 0.0505  | 0.0222         | 0.0117         | 0.0169         | -0.0105 |



|       |        |        |        |        |         |         |         |
|-------|--------|--------|--------|--------|---------|---------|---------|
| 26(H) | 0.0256 | 0.0147 | 0.0515 | 0.0259 | 0.0109  | 0.0184  | -0.0149 |
| 27(H) | 0.0245 | 0.0194 | 0.0367 | 0.0121 | 0.0051  | 0.0086  | -0.007  |
| 28(H) | 0.0267 | 0.0324 | 0.0337 | 0.007  | -0.0057 | 0.0006  | -0.0127 |
| 29(H) | 0.0278 | 0.0157 | 0.0478 | 0.02   | 0.0121  | 0.0161  | -0.0079 |
| 30(H) | 0.0308 | 0.0288 | 0.0411 | 0.0103 | 0.0019  | 0.0061  | -0.0083 |
| 31(H) | 0.0272 | 0.0358 | 0.0284 | 0.0012 | -0.0086 | -0.0037 | -0.0099 |
| 32(H) | 0.0342 | 0.0237 | 0.0453 | 0.0111 | 0.0106  | 0.0108  | -0.0005 |
| 33(H) | 0.0324 | 0.0219 | 0.0483 | 0.0159 | 0.0105  | 0.0132  | -0.0054 |
| 34(H) | 0.0373 | 0.0073 | 0.0595 | 0.0222 | 0.03    | 0.0261  | 0.0078  |
| 35(H) | 0.0447 | 0.0053 | 0.0735 | 0.0288 | 0.0394  | 0.0341  | 0.0105  |
| 36(H) | 0.04   | 0.0025 | 0.0711 | 0.031  | 0.0375  | 0.0343  | 0.0065  |
| 37(H) | 0.0434 | 0.0012 | 0.0698 | 0.0263 | 0.0423  | 0.0343  | 0.0159  |
| 38(H) | 0.0447 | 0.0039 | 0.0718 | 0.0271 | 0.0408  | 0.034   | 0.0137  |
| 39(H) | 0.0459 | 0.0056 | 0.0715 | 0.0256 | 0.0403  | 0.0329  | 0.0147  |
| 40(H) | 0.0467 | 0.0082 | 0.0592 | 0.0125 | 0.0385  | 0.0255  | 0.026   |

---

195 **Supplementary Table 3.** The referenced studies in the comparison of electrocatalysis  
 196 efficiency.

|     | Membrane materials                                                                                                                       | $k$ , min <sup>-1</sup> | 1/EEO,<br>m <sup>3</sup> order kWh <sup>-1</sup> | Reference  |
|-----|------------------------------------------------------------------------------------------------------------------------------------------|-------------------------|--------------------------------------------------|------------|
|     | N-doped defective carbon nanofiber                                                                                                       | 114.1                   | 34.48                                            | This study |
| S1  | BDD/ADE–Pt/CF                                                                                                                            | 0.0029                  | 0.015                                            | 5          |
| S2  | Nb/BDD                                                                                                                                   | 0.0101                  | 0.024                                            | 6          |
| S3  | Ti/Ir <sub>x</sub> Ta <sub>y</sub> O <sub>2</sub> /[Bi <sub>2</sub> O <sub>3</sub> ] <sub>z</sub> [TiO <sub>2</sub> ] <sub>1-z</sub>     | 0.0217                  | 0.208                                            | 7          |
| S4  | Ti/Pt                                                                                                                                    | 0.0326                  | 0.227                                            | 8          |
| S5  | Ti-Pt                                                                                                                                    | 0.0226                  | 0.571                                            | 9          |
| S6  | Pt                                                                                                                                       | 0.9210                  | 3.030                                            | 10         |
| S7  | Pd–Pt–ceramic membrane                                                                                                                   | 4.6072                  | 57.67                                            | 11         |
| S8  | Cobalt-doped Black-TiO <sub>2</sub> nanotube array                                                                                       | 0.0048                  | 0.011                                            | 12         |
| S9  | Ti/Ru <sub>0.3</sub> Ti <sub>0.7</sub> O                                                                                                 | 0.0161                  | 0.016                                            | 13         |
| S10 | Electrodeposited polytetrafluoroethylene (PTFE)-doped β-PbO <sub>2</sub>                                                                 | 0.0154                  | 0.020                                            | 14         |
| S11 | 3G/SnO <sub>2</sub> /CFs                                                                                                                 | 0.238                   | 0.024                                            | 15         |
| S12 | A composite wire mesh anode (composed of blue TiO <sub>2</sub> nanotubes covered with SnO <sub>2</sub> –Sb <sub>2</sub> O <sub>3</sub> ) | 0.0076                  | 0.121                                            | 16         |
| S13 | TiO <sub>2</sub> nanotubes arrays electrode                                                                                              | 0.0253                  | 0.122                                            | 17         |
| S14 | Sb-doped SnO <sub>2</sub> with TiO <sub>2</sub> nanotube clusters on Ti mesh                                                             | 0.0676                  | 0.312                                            | 18         |
| S15 | Ti/SnO <sub>2</sub> -Sb                                                                                                                  | 0.24                    | 0.690                                            | 19         |
| S16 | TiO <sub>2</sub> @SnO <sub>2</sub> -Sb                                                                                                   | 0.0019                  | 0.805                                            | 20         |
| S17 | Ti/SnO <sub>2</sub> -Sb/Ce-PbO <sub>2</sub>                                                                                              | 0.649                   | 1.344                                            | 21         |
| S18 | Blue-TiO <sub>2</sub> nanotubes                                                                                                          | 0.0071                  | 1.587                                            | 22         |
| S19 | Macroporous-Ti-enhanced TiO <sub>2</sub> nanotube                                                                                        | 0.124                   | 1.724                                            | 23         |

|     |                                                                                                         |        |       |    |
|-----|---------------------------------------------------------------------------------------------------------|--------|-------|----|
|     | array/SnO <sub>2</sub> -Sb <sub>2</sub> O <sub>3</sub>                                                  |        |       |    |
| S20 | Bi-doped SnO <sub>2</sub> -Ti <sub>n</sub> O <sub>2n-1</sub>                                            | 115.1  | 2.381 | 24 |
| S21 | SnO <sub>2</sub> -Sb reactive anodic filter                                                             | 1.485  | 3.030 | 25 |
| S22 | Ti <sub>4</sub> O <sub>7</sub>                                                                          | 20.98  | 3.704 | 26 |
| S23 | Blue-colored TiO <sub>2</sub> nanotube arrays                                                           | 0.403  | 11.63 | 27 |
| S24 | Ti <sub>4</sub> O <sub>7</sub> reactive electrochemical membrane                                        | 0.0298 | 4.303 | 28 |
| S25 | Porous Ti-ENTA/SnO <sub>2</sub> -Sb anode                                                               | 0.1197 | 0.049 | 29 |
| S26 | Flow-through Ti/TiO <sub>2</sub> -NTA/Ti <sub>4</sub> O <sub>7</sub> anode                              | 0.083  | 0.758 | 30 |
| S27 | TiSO electroactive ceramic membrane                                                                     | 0.124  | 0.235 | 31 |
| S28 | Reduced TiO <sub>2</sub> nanotube arrays-based Ti membrane                                              | 0.0395 | 1.818 | 32 |
| S29 | Porous Ti-ENTA/SnO <sub>2</sub> -Sb                                                                     | 0.0914 | 1.613 | 33 |
| S30 | IrO <sub>2</sub> and Ta <sub>2</sub> O <sub>5</sub> coating on titanium mesh and Fe foam coated with Pd | 0.0894 | 0.019 | 34 |
| S31 | Blue TiO <sub>2</sub> nanotube electrocatalytic membrane                                                | 0.235  | 3.704 | 35 |
| S32 | Multi-walled carbon nanotube                                                                            | 2.1    | 0.500 | 36 |
| S33 | Carbon nanotube electrochemical filter                                                                  | 98.9   | 6.933 | 37 |
| S34 | Coal-based carbon membrane                                                                              | 3.985  | 20.31 | 38 |
| S35 | FeNi LDH/CNT membranes                                                                                  | 0.0328 | 2.580 | 39 |
| S36 | Graphene sponge                                                                                         | 1.002  | 0.149 | 40 |
| S37 | FeOCl-CNT filters                                                                                       | 106.0  | 6.848 | 41 |
| S38 | CNT filter modified with MIL-101(Fe)                                                                    | 0.015  | 7.297 | 42 |
| S39 | BDD                                                                                                     | 0.0388 | 0.005 | 43 |
| S40 | BDD                                                                                                     | 0.0158 | 0.040 | 44 |
| S41 | BDD                                                                                                     | 0.0715 | 1.429 | 45 |

198 **Supplementary Table 4.** The referenced studies in the comparison of stable operation time in  
 199 **Supplementary Figure 28.**

| Reference     | Electrocatalyst                                       | Stable time, min | Target pollutant |
|---------------|-------------------------------------------------------|------------------|------------------|
| <sup>46</sup> | Hybrid graphene-decorated metal hollow fiber membrane | 12               | Paracetamol      |
| <sup>36</sup> | Multi-walled carbon nanotube filter                   | 120              | Sulfamethoxazole |
| <sup>37</sup> | Carbon nanotube electrochemical filter                | 180              | Tetracycline     |
| This study    | N-doped defective carbon nanofiber membrane           | 720              | Propranolol      |

200

201 **Supplementary Table 5.** The boundary condition and related coefficients used in the  
 202 multiphysics simulations.

| Parameter  | Value                                          | Definition                       |
|------------|------------------------------------------------|----------------------------------|
| $\mu_{in}$ | $3 \times 10^{-4} \text{ m s}^{-1}$            | flow-in velocity                 |
| $n$        | 1                                              | number of electrons transferred  |
| $a$        | 0.5                                            | electron transfer coefficient    |
| $E^0$      | 2.5 V                                          | formal potential                 |
| $E$        | 3 V                                            | applied potential                |
| $i_0$      | $8 \times 10^{-4} \text{ A m}^{-2}$            | exchange current density         |
| $C_0$      | $0.0676 \text{ mol m}^{-3}$                    | pollutant concentration at inlet |
| $\kappa_s$ | $0.22 \text{ S m}^{-1}$                        | conductivity of solution         |
| $D$        | $5 \times 10^{-10} \text{ m}^2 \text{ s}^{-1}$ | pollutant diffusivity            |
| $T$        | 293.15 K                                       | room temperature                 |

203

## 204 References

205

- 206 1. Melis N, Mocci F, Vacca A & Pilia L. Novel homogeneous selective electrocatalysts for  
 207 CO<sub>2</sub> reduction: an electrochemical and computational study of cyclopentadienyl-  
 208 phenylendiamino-cobalt complexes. *Sustainable Energy Fuels* **4**, 5609–5617 (2020).

- 209 2. Duan X, *et al.* Electrocatalytic degradation of 2,4-dichlorophenol by a 3DG-PbO<sub>2</sub>  
210 powdered anode: Experimental and theoretical insights. *Sep Purif Technol* **282**, 120003  
211 (2022).
- 212 3. Lu T & Chen F. Multiwfn: A multifunctional wavefunction analyzer. *J Comput Chem*  
213 **33**, 580–592 (2012).
- 214 4. Lu T & Chen Q. Realization of conceptual density functional theory and information-  
215 theoretic approach in Multiwfn program. In: *Conceptual Density Functional Theory*  
216 (2022).
- 217 5. Isarain-Chávez E, *et al.* Degradation of pharmaceutical beta-blockers by  
218 electrochemical advanced oxidation processes using a flow plant with a solar compound  
219 parabolic collector. *Water Res* **45**, 4119–4130 (2011).
- 220 6. García-Espinoza JD, Zolfaghari M & Mijaylova Nacheva P. Synergistic effect between  
221 ultraviolet irradiation and electrochemical oxidation for removal of humic acids and  
222 pharmaceuticals. *Water Environ J* **34**, 232–246 (2020).
- 223 7. Jasper JT, Shafaat OS & Hoffmann MR. Electrochemical transformation of trace  
224 organic contaminants in latrine wastewater. *Environ Sci Technol* **50**, 10198–10208  
225 (2016).
- 226 8. Song H, *et al.* Nonradical oxidation from electrochemical activation of peroxydisulfate  
227 at Ti/Pt anode: Efficiency, mechanism and influencing factors. *Water Res* **116**, 182–193  
228 (2017).
- 229 9. Zambrano J & Min B. Comparison on efficiency of electrochemical phenol oxidation  
230 in two different supporting electrolytes (NaCl and Na<sub>2</sub>SO<sub>4</sub>) using Pt/Ti electrode.  
231 *Environ Technol Innovation* **15**, 100382 (2019).
- 232 10. Mbaye M, *et al.* Rapid removal of fungicide thiram in aqueous medium by electro-  
233 Fenton process with Pt and BDD anodes. *Sep Purif Technol* **281**, 119837 (2022).
- 234 11. Zhao Y, *et al.* Janus electrocatalytic flow-through membrane enables highly selective  
235 singlet oxygen production. *Nat Commun* **11**, 6228 (2020).
- 236 12. Yang Y, *et al.* Cobalt-doped black TiO<sub>2</sub> nanotube array as a stable anode for oxygen  
237 evolution and electrochemical wastewater treatment. *ACS Catal* **8**, 4278–4287 (2018).
- 238 13. Fukunaga MT, Guimarães JR & Bertazzoli R. Kinetics of the oxidation of  
239 formaldehyde in a flow electrochemical reactor with TiO<sub>2</sub>/RuO<sub>2</sub> anode. *Chem Eng J*  
240 **136**, 236–241 (2008).
- 241 14. Sánchez-Montes I, *et al.* Evolution of the antibacterial activity and oxidation  
242 intermediates during the electrochemical degradation of norfloxacin in a flow cell with  
243 a PTFE-doped β-PbO<sub>2</sub> anode: Critical comparison to a BDD anode. *Electrochim Acta*  
244 **284**, 260–270 (2018).
- 245 15. Yu S, *et al.* Electrospun PAN-based graphene/SnO<sub>2</sub> carbon nanofibers as anodic  
246 electrocatalysis microfiltration membrane for sulfamethoxazole degradation. *J Membr*  
247 *Sci* **614**, 118368 (2020).
- 248 16. Meng X, *et al.* Development of a three-dimensional electrochemical system using a  
249 blue TiO<sub>2</sub>/SnO<sub>2</sub>-Sb<sub>2</sub>O<sub>3</sub> anode for treating low-ionic-strength wastewater. *Environ Sci*  
250 *Technol* **53**, 13784–13793 (2019).

- 251 17. Wang K, *et al.* Insights into electrochemical decomposition mechanism of  
252 lipopolysaccharide using TiO<sub>2</sub> nanotubes arrays electrode. *J Hazard Mater* **391**, 122259  
253 (2020).
- 254 18. Huang L, *et al.* Construction of TiO<sub>2</sub> nanotube clusters on Ti mesh for immobilizing  
255 Sb-SnO<sub>2</sub> to boost electrocatalytic phenol degradation. *J Hazard Mater* **393**, 122329  
256 (2020).
- 257 19. Zhou C, Wang Y, Chen J & Niu J. Porous Ti/SnO<sub>2</sub>-Sb anode as reactive electrochemical  
258 membrane for removing trace antiretroviral drug stavudine from wastewater. *Environ*  
259 *Int* **133**, 105157 (2019).
- 260 20. Zheng J, Wang Z, Ma J, Xu S & Wu Z. Development of an electrochemical ceramic  
261 membrane filtration system for efficient contaminant removal from waters. *Environ Sci*  
262 *Technol* **52**, 4117–4126 (2018).
- 263 21. Xu L, Ma X, Niu J, Chen J & Zhou C. Removal of trace naproxen from aqueous solution  
264 using a laboratory-scale reactive flow-through membrane electrode. *J Hazard Mater*  
265 **379**, 120692 (2019).
- 266 22. Cai J, Zhou M, Pan Y, Du X & Lu X. Extremely efficient electrochemical degradation  
267 of organic pollutants with co-generation of hydroxyl and sulfate radicals on Blue-TiO<sub>2</sub>  
268 nanotubes anode. *Appl Catal B* **257**, 117902 (2019).
- 269 23. Chen M, *et al.* Development of a highly efficient electrochemical flow-through anode  
270 based on inner in-site enhanced TiO<sub>2</sub>-nanotubes array. *Environ Int* **140**, 105813 (2020).
- 271 24. Gayen P, Chen C, Abiade JT & Chaplin BP. Electrochemical oxidation of atrazine and  
272 clothianidin on Bi-doped SnO<sub>2</sub>-Ti<sub>n</sub>O<sub>2n-1</sub> electrocatalytic reactive electrochemical  
273 membranes. *Environ Sci Technol* **52**, 12675–12684 (2018).
- 274 25. Yang C, Fan Y, Shang S, Li P & Li X-y. Fabrication of a permeable SnO<sub>2</sub>-Sb reactive  
275 anodic filter for high-efficiency electrochemical oxidation of antibiotics in wastewater.  
276 *Environ Int* **157**, 106827 (2021).
- 277 26. Misal SN, Lin M-H, Mehraeen S & Chaplin BP. Modeling electrochemical oxidation  
278 and reduction of sulfamethoxazole using electrocatalytic reactive electrochemical  
279 membranes. *J Hazard Mater*, 121420 (2019).
- 280 27. Xu L, *et al.* Effective degradation of aqueous carbamazepine on a novel blue-colored  
281 TiO<sub>2</sub> nanotube arrays membrane filter anode. *J Hazard Mater* **402**, 123530 (2021).
- 282 28. Zhi D, *et al.* Development of ozonation and reactive electrochemical membrane  
283 coupled process: Enhanced tetracycline mineralization and toxicity reduction. *Chem*  
284 *Eng J* **383**, 123149 (2020).
- 285 29. Hakizimana I, *et al.* Effective degradation of amoxicillin by multi-stage flow-through  
286 electrochemical system using porous electrodes. *Sep Purif Technol* **300**, 121832 (2022).
- 287 30. Meng C, *et al.* Efficient electrochemical oxidation of COVID-19 treatment drugs  
288 favipiravir by a novel flow-through Ti/TiO<sub>2</sub>-NTA/Ti<sub>4</sub>O<sub>7</sub> anode. *Electrochim Acta* **430**,  
289 141055 (2022).
- 290 31. Wang S, Pei S, Zhang J, Huang J & You S. Flow-through electrochemical removal of  
291 benzotriazole by electroactive ceramic membrane. *Water Res* **218**, 118454 (2022).
- 292 32. Zeng W, *et al.* Efficient electrochemical oxidation of sulfamethoxazole by a novel

- 293 reduced TiO<sub>2</sub> nanotube arrays-based flow-through electrocatalytic membrane. *Sep*  
294 *Purif Technol* **289**, 120720 (2022).
- 295 33. Zhang C, Zhao X, Wang C & Pan S. Novel multistage electrochemical flow-through  
296 mode (EFTM) with porous electrodes for reclaimed wastewater treatment in pipes. *ACS*  
297 *ES&T Water* **1**, 653–660 (2021).
- 298 34. Hyldegaard BH, Ottosen LM & Alshawabkeh AN. Transformation of  
299 tetrachloroethylene in a flow-through electrochemical reactor. *Sci Total Environ* **707**,  
300 135566 (2020).
- 301 35. Wang L, *et al.* Blue TiO<sub>2</sub> nanotube electrocatalytic membrane electrode for efficient  
302 electrochemical degradation of organic pollutants. *Chemosphere* **306**, 135628 (2022).
- 303 36. Tan T-Y, *et al.* Electrochemically enhanced simultaneous degradation of  
304 sulfamethoxazole, ciprofloxacin and amoxicillin from aqueous solution by multi-  
305 walled carbon nanotube filter. *Sep Purif Technol* **235**, 116167 (2020).
- 306 37. Liu Y, *et al.* Degradation of the common aqueous antibiotic tetracycline using a carbon  
307 nanotube electrochemical filter. *Environ Sci Technol* **49**, 7974–7980 (2015).
- 308 38. Pan Z, *et al.* Electrochemical microfiltration treatment of bisphenol A wastewater using  
309 coal-based carbon membrane. *Sep Purif Technol* **227**, 115695 (2019).
- 310 39. Yang L, Xu D, Yang H, Luo X & Liang H. Structurally-controlled FeNi LDH/CNTs  
311 electro-Fenton membrane for in-situ electro-generation and activation of hydroxyl  
312 radicals toward organic micropollutant treatment. *Chem Eng J* **432**, 134436 (2022).
- 313 40. Ormeno-Cano N & Radjenovic J. Electrochemical degradation of antibiotics using  
314 flow-through graphene sponge electrodes. *J Hazard Mater* **431**, 128462 (2022).
- 315 41. Li Z, *et al.* Carbon nanotube filter functionalized with iron oxychloride for flow-  
316 through electro-Fenton. *Appl Catal B* **260**, 118204 (2020).
- 317 42. Dai Y, *et al.* Carbon nanotube filter functionalized with MIL-101(Fe) for enhanced  
318 flow-through electro-Fenton. *Environ Res* **204**, 112117 (2022).
- 319 43. Carneiro JF, *et al.* The effect of the supporting electrolyte on the electrooxidation of  
320 enrofloxacin using a flow cell with a BDD anode: Kinetics and follow-up of oxidation  
321 intermediates and antimicrobial activity. *Chemosphere* **206**, 674–681 (2018).
- 322 44. Coledam DAC, Aquino JM, Silva BF, Silva AJ & Rocha-Filho RC. Electrochemical  
323 mineralization of norfloxacin using distinct boron-doped diamond anodes in a filter-  
324 press reactor, with investigations of toxicity and oxidation by-products. *Electrochim*  
325 *Acta* **213**, 856–864 (2016).
- 326 45. Carneiro JF, Aquino JM, Silva BF, Silva AJ & Rocha-Filho RC. Comparing the  
327 electrochemical degradation of the fluoroquinolone antibiotics norfloxacin and  
328 ciprofloxacin using distinct electrolytes and a BDD anode: evolution of main oxidation  
329 byproducts and toxicity. *J Environ Chem Eng* **8**, 104433 (2020).
- 330 46. Huong Le TX, *et al.* Hybrid graphene-decorated metal hollow fibre membrane reactors  
331 for efficient electro-Fenton - Filtration co-processes. *J Membr Sci* **587**, 117182 (2019).
